1 **The *Legionella pneumophila* metaeffector Lpg2505 (SusF) regulates SidI-mediated translation**  
2 **inhibition and GDP-dependent glycosyltransferase activity**

3  
4 Ashley M. Joseph<sup>1</sup>, Adrienne E. Pohl<sup>1</sup>, Theodore J. Ball<sup>1</sup>, Troy G. Abram<sup>2</sup>, David K. Johnson<sup>3</sup>,  
5 Brian V. Geisbrecht<sup>2</sup> and Stephanie R. Shames<sup>1\*</sup>

6  
7 <sup>1</sup>Division of Biology, <sup>2</sup>Department of Biochemistry and Molecular Biophysics, Kansas State  
8 University, Manhattan KS 66506

9 <sup>3</sup>Molecular Graphics and Modeling Laboratory, Computational Chemical Biology Core,  
10 University of Kansas, Lawrence KS 66047

11  
12 \*Corresponding author: Stephanie R. Shames, [sshames@ksu.edu](mailto:sshames@ksu.edu), Phone: (785) 532-0110

13  
14 **Running title:** Metaeffector-mediated regulation of SidI function

15  
16 **Key words:** Dot/Icm effector, SidI, *Legionella pneumophila*, metaeffector, glycosyltransferase,  
17 eEF1A

18

## 19 **Abstract**

20 *Legionella pneumophila*, the etiological agent of Legionnaires Disease, employs an arsenal of  
21 hundreds of Dot/Icm-translocated effector proteins to facilitate replication within eukaryotic  
22 phagocytes. Several effectors, called metaeffectors, function regulate the activity of other  
23 Dot/Icm-translocated effectors during infection. The metaeffector Lpg2505 is essential for *L.*  
24 *pneumophila* intracellular replication only when its cognate effector, SidI, is present. SidI is a  
25 cytotoxic effector that interacts with the host translation factor eEF1A and potently inhibits  
26 eukaryotic protein translation by an unknown mechanism. Here, we evaluated the impact of  
27 Lpg2505 on SidI-mediated phenotypes and investigated the mechanism of SidI function. We  
28 determined that Lpg2505 binds with nanomolar affinity to SidI and suppresses SidI-mediated  
29 inhibition of protein translation. SidI binding to eEF1A and SusF is not mutually exclusive and  
30 these proteins bind distinct regions of SidI. We also discovered that SidI possesses GDP-  
31 dependent glycosyltransferase activity and that this activity is regulated by Lpg2505. We have  
32 therefore renamed Lpg2505, SusF (suppressor of SidI function). This work reveals novel  
33 enzymatic activity for SidI and provides insight into how intracellular replication of *L.*  
34 *pneumophila* is regulated by a metaeffector.

35

## 36 **Introduction**

37 *Legionella pneumophila* is the etiological agent of Legionnaires' Disease, a severe  
38 inflammatory pneumonia that results from uncontrolled bacterial replication within alveolar  
39 macrophages. Upon phagocytosis, *L. pneumophila* avoids lysosomal degradation through

40 establishment of an endoplasmic reticulum-derived compartment called the *Legionella*-containing  
41 vacuole (LCV) (1). For biogenesis of the LCV and acquisition of nutrients from the host cell, *L.*  
42 *pneumophila* is dependent on a massive arsenal of over 300 individual effector proteins that are  
43 translocated directly into the host cell through a Dot/Icm Type IVB secretion system (T4BSS) (2).  
44 The cellular functions of the majority of effectors have yet to be elucidated, due in part to their  
45 functional redundancy within macrophages (3).

46 Metaeffectors have emerged as a common theme in *L. pneumophila* pathogenesis and are  
47 used by *L. pneumophila* to regulate effector function (4). The first metaeffector described was LubX,  
48 which temporally regulates function of its cognate effector SidH by hijacking host ubiquitination  
49 machinery to facilitate proteasomal degradation of SidH (5). At least 20 of the over 300 identified  
50 *L. pneumophila* effectors are metaeffectors (4) and two of these – SidJ and Lpg2505 – are members  
51 of a small group of effectors that are individually important for *L. pneumophila* intracellular  
52 replication within macrophages (6–8). SidJ is a glutamylase that covalently modifies and  
53 abrogates the function of the SidE family of effector ubiquitin ligases (9–11). Lpg2505 is a  
54 metaeffector of unknown function that suppresses toxicity of its cognate effector, SidI (Lpg2504),  
55 and is important for intracellular replication only when wild-type *sidI* is expressed (6). This was  
56 demonstrated by restoration of *L. pneumophila*  $\Delta$ *lpg2505* intracellular replication upon either  
57 deletion of *sidI* or expression of a non-toxic *sidI* allele (R453P). It was further found that Lpg2505  
58 was sufficient to suppress SidI-mediated toxicity towards the yeast *Saccharomyces cerevisiae* (6).  
59 Thus, SidI activity is deleterious to *L. pneumophila* in the absence of Lpg2505, a unique phenotype  
60 for a translocated effector.

61 SidI is one of seven cytotoxic *L. pneumophila* effector proteins that inhibit host cell protein  
62 translation (12). Like the majority of *L. pneumophila* effectors, *sidI* alone is dispensable for  
63 intracellular replication within macrophages, likely due to functional redundancy with other  
64 effectors (12). Other translation inhibiting effectors include Lgt1-3, SidL, LegK4, and Lpg1489 (12–  
65 16). Lgt1-3 are glycosyltransferases that inhibit translation by glucosylating eukaryotic elongation  
66 factor 1A (eEF1A) at Ser-53 (17–19). LegK4 is an effector kinase that phosphorylates heat-shock  
67 protein 70 (Hsp70), thereby reducing its ATPase activity and protein refolding activities (16). SidL  
68 and Lpg1489 have been experimentally demonstrated to inhibit host protein synthesis (13, 15),  
69 but their modes of action are unknown. Like Lgt1-3, SidI also interacts with eEF1A; however, this  
70 interaction is insufficient for translation inhibition (12). SidI also interacts with eEF1B $\gamma$  and  
71 induces the host heat shock response (12). To date, the mechanism(s) by which SidI functions  
72 within the host cell to inhibit host protein synthesis have not been elucidated.

73 In this study we aimed to discern how Lpg2505 regulates SidI and gain insight into the  
74 molecular mechanism of SidI function. We discovered that Lpg2505 and SidI bind with  
75 nanomolar affinity and that Lpg2505 suppresses SidI-mediated translation inhibition *in vitro*.  
76 Furthermore, SidI interaction with Lpg2505 and eEF1A are not mutually exclusive and these two  
77 proteins bind with distinct regions of SidI. Finally, we discovered novel GDP-dependent  
78 glycosyltransferase activity for SidI, which is regulated by Lpg2505. For this reason, we have  
79 named Lpg2505 as *suppressor of SidI function* (SusF).

80

81 **Results**

82 *SusF and SidI bind with nanomolar affinity.*

83 Lpg2505 (SusF) is sufficient to suppress SidI-mediated cytotoxicity and promote *L. pneumophila*  
84 intracellular replication (6). To reveal a potential mechanism for SusF-mediated regulation of SidI,  
85 we evaluated whether SusF interacts with SidI. Since effectors function within host cells, we  
86 investigated whether SidI and SusF interact in the presence of host cell lysates. HEK 293 cells  
87 stably producing 3FLAG-eipotpe tagged SusF were generated and we initially attempted to  
88 ectopically express GFP-tagged *sidI* within these cells for co-immunoprecipitation. However,  
89 wild-type SidI could not be detected, likely due to potent translation inhibition. Thus, we  
90 generated recombinant GST-tagged SidI (GST-SidI) and evaluated its ability to interact with  
91 3FLAG-SusF within HEK 293 lysates (see *Materials and Methods*). We found that GST-SidI, but not  
92 GST alone, retained 3FLAG-SusF on glutathione-coated beads (**Fig 1A**). Furthermore, GST-SidI -  
93 but not GST alone - was retained on Ni-NTA beads coated with recombinant His<sub>6</sub>-SusF (**Fig 1B**).  
94 Thus, SusF interacts with SidI in the presence or absence of mammalian cell lysates.

95 To determine if SidI and SusF bind directly, we examined the ability of these proteins to associate  
96 with one another throughout the course of sequential column chromatography procedures. SidI  
97 and SusF were co-expressed in *Escherichia coli*, purified by Ni-NTA affinity chromatography (see  
98 *Materials and Methods*), and the eluted proteins were separated by analytical format size exclusion  
99 chromatography. We found that SidI and SusF co-eluted from the column as a species  
100 corresponding to a molecular weight of ~150 kDa, as judged by comparison to a panel of known  
101 protein standards (**Fig 1C**). Bands corresponding to both proteins were detected in samples of

102 column fractions that had been separated by SDS-PAGE and analyzed by Coomassie staining (**Fig**  
103 **S1**). Thus, SidI and SusF interact directly and appeared to form a stable complex.

104 We subsequently used surface plasmon resonance (SPR) to investigate the affinity and kinetics of  
105 the SusF-SidI interaction. We immobilized SusF on an SPR surface using random amine chemistry  
106 and injected recombinant, purified SidI at increasing concentrations. We employed a single-cycle  
107 approach due to difficulty with regenerating the SusF surface following exposure to SidI. We  
108 found that the reference-corrected sensorgram could be described fairly well by a Langmuir  
109 binding model ( $K_D = 0.89$  nM and  $\chi^2 = 3.26$ ) (**Fig. S2**), but was better fit to a two-state reaction  
110 model ( $K_D = 3.1$  nM and  $\chi^2 = 0.79$ ) (**Fig 1D**). A particularly noteworthy feature of the SusF-SidI  
111 interaction is its long half-life, with an estimate dissociation rate constant between  $2\text{-}5 \times 10^{-4}$  s<sup>-1</sup>.  
112 This observation explains, at least in part, the ability of SusF and SidI to remain associated with  
113 one another throughout the co-purification procedures described above. Taken together, these  
114 data indicate that SusF binds directly to SidI and forms a high-affinity complex with a  $K_D$  of  $\sim 1$   
115 nM.

116

### 117 *SusF suppresses SidI-mediated translation inhibition.*

118 Based on the high-affinity interaction between SidI and SusF, we hypothesized that SusF  
119 represses SidI-mediated translation inhibition. To test this hypothesis, we quantified translation  
120 of *Firefly* luciferase mRNA (Luc mRNA) *in vitro* (see *Materials and Methods*). This assay was used  
121 previously to demonstrate that  $\geq 5$  ng of recombinant SidI was sufficient to completely abolish  
122 translation (12). We confirmed that purified His<sub>6</sub>-SidI significantly attenuates protein translation

123 and additionally revealed that purified SusF alone has no impact on translation (**Fig 2A**). We  
124 further determined that SusF significantly rescues translation in the presence of SidI ( $P < 0.01$ , **Fig**  
125 **2B**). Thus, SusF is sufficient to suppress SidI-mediated translation inhibition *in vitro*.

126 Our SPR data demonstrates that the SidI-SusF interaction occurs rapidly. We therefore  
127 hypothesized that pre-formation of the SidI-SusF complex would not result in further attenuation  
128 of SidI-mediated translation inhibition. To determine whether or not pre-formation of the SidI-  
129 SusF complex would enhance SusF-mediated suppression of translation inhibition, we incubated  
130 SidI with SusF for 30 min prior to addition to the *in vitro* translation reaction. Pre-formation of  
131 the SidI-SusF complex did not further attenuate SidI-mediated translation inhibition (**Fig 2C**; see  
132 *Materials and Methods*). Furthermore, SusF was insufficient to reverse SidI-mediated translation  
133 inhibition since addition of SusF to the reaction after either 30 min or 60 min did not restore  
134 translation (**Fig 2C**). Finally, we evaluated whether suppression of SidI-mediated translation  
135 inhibition by SusF was dose dependent. SusF was added in concentrations ranging from  
136 equimolar up to a 15-fold molar excess relative to SidI. An equimolar amount of SusF was  
137 sufficient to suppress SidI-mediated translation inhibition and translation was not further  
138 enhanced by addition of up to a 15-fold molar excess of SusF (**Fig 2D**). Thus, equimolar amounts  
139 of SusF are sufficient to suppresses SidI-mediated translation inhibition.

140

141 *SusF does not affect the interaction between SidI and eEF1A.*

142 A previous report demonstrated that SidI interacts directly with the transcription factor  
143 eukaryotic elongation factor 1A (eEF1A) (12). We therefore investigated whether the interactions

144 between SidI and eEF1A or SusF are mutually exclusive. GST-SusF or GST alone were  
145 immobilized on glutathione beads and incubated with His<sub>6</sub>-SidI that was pre-incubated with  
146 HEK 293T lysates. We found that eEF1A was retained on the beads only in the presence of SidI  
147 and that eEF1A did not impair interaction between SusF and SidI (**Fig 3A**). Subsequently, we  
148 asked whether increasing the concentration of SusF would influence the SidI-eEF1A interaction.  
149 We incubated GST-SidI with eEF1A (from HEK 293T lysates, see *Materials and Methods*) followed  
150 by increasing concentrations of purified recombinant SusF. Despite SusF concentration increasing  
151 100-fold, GST-SidI still retained eEF1A on the beads (**Fig 3B**), suggesting that SidI interacts with  
152 SusF and eEF1A simultaneously. The same result was observed when SusF was incubated with  
153 GST-SidI prior to HEK 293T lysates (**Fig S3**). Thus, SidI binding to eEF1A and SusF is not  
154 mutually exclusive.

155

### 156 *SusF and eEF1A interact with distinct regions of SidI.*

157 Since both SusF and eEF1A are capable of binding SidI simultaneously, we hypothesized that  
158 these proteins interact with SidI at distinct sites. SidI has a molecular weight of ~ 110 kDa and  
159 consists of 942 amino acids. Since the structure of SidI has not been solved, we used the RaptorX  
160 webserver (20) to predict the domain structure of SidI. Based on the predicted domains (**Fig S4**),  
161 we generated SidI truncations consisting of amino acid residues 1-268 (SidI<sub>N</sub>), 269-942 (SidI<sub>C</sub>) and  
162 269-874 (SidI<sub>Δ68</sub>) (**Fig 4A**). To determine which of these putative SidI domains is involved in  
163 interaction with SusF and eEF1A, we immobilized GST-tagged full-length SidI, SidI<sub>N</sub>, SidI<sub>C</sub>,  
164 SidI<sub>Δ68</sub>, or GST alone on glutathione beads followed by incubation with lysates from HEK 293



165 cells stably producing 3FLAG-SusF. Western blot analysis was used to detect 3FLAG-SusF and  
166 eEF1A bound to SidI truncation proteins (see *Materials and Methods*). We confirmed that GST-SidI,  
167 but not GST alone, was capable of retaining both SusF and eEF1A on the beads. 3FLAG-SusF was  
168 further retained on beads coated with GST-SidI<sub>N</sub> and GST-SidI<sub>C</sub> but not GST-SidI<sub>Δ68</sub>, whereas  
169 eEF1A was retained by GST-SidI<sub>C</sub> and GST-SidI<sub>Δ68</sub> (**Fig 4B**). To control for the potential influence  
170 of 3FLAG-SusF on eEF1A binding to SidI, we repeated this experiment using HEK 293 cells that  
171 do not express *3FLAG-susF*. We observed the same pattern of interactions between eEF1A and  
172 the C-terminal region of SidI in the absence of 3FLAG-SusF (**Fig S5**). Based on these data, we  
173 conclude that SusF interacts with SidI at regions within amino acid residues 1-268 and 874-942  
174 whereas eEF1A interaction with SidI is dependent on amino acid residues 269-874. Together,  
175 these data suggest SusF interacts with two regions of SidI that are distinct from the site of SidI  
176 interaction with eEF1A.

177

178 *SidI is not dependent on SusF for translocation into host cells.*

179 The majority of *L. pneumophila* effector proteins rely on a C-terminal translocation signal for  
180 Dot/Icm-mediated translocation into host cells (21, 22). Based on the observed interaction  
181 between SusF and the C-terminal 68 amino acid residues of SidI, we hypothesized that SusF may  
182 impact Dot/Icm-mediated translocation of SidI. To test this hypothesis, we quantified the export  
183 of SidI fused to *Bordetella pertussis* adenylate cyclase (CyaA) (21). When CyaA fusion proteins  
184 reach the cytosol of eukaryotic cells they catalyze formation of cAMP, which can be quantified  
185 using cAMP-specific ELISA. Based on potent toxicity associated with wild-type SidI, a non-toxic

186 *sidI* allele (R453P; SidI<sub>RP</sub>) was used for these experiments (6, 12). Expression of CyaA-SusF and  
187 CyaA-SidI<sub>RP</sub> was confirmed using Western blot analysis (**Fig 5A**). Subsequently, we found that  
188 cAMP production by host cells was significantly increased following infection with wild-type  
189 and  $\Delta$ *susF*, but not  $\Delta$ *dotA*, strains of *L. pneumophila* producing CyaA-SidI<sub>RP</sub> (**Fig 5B**). Translocation  
190 of CyaA-RalF was used as a positive control for Dot/Icm-dependent translocation (21) (**Fig 5A,**  
191 **B**). Together, these data demonstrate that SidI is not dependent on SusF for translocation into  
192 host cells.

193

194 *Binding to eEF1A is insufficient for SidI-mediated translation inhibition.*

195 Subsequently, we investigated the ability of truncated SidI proteins to influence protein  
196 translation. At concentrations equivalent to SidI, neither SidI<sub>N</sub> nor SidI<sub>CA68</sub> were sufficient to  
197 inhibit protein translation *in vitro* (**Fig 6A**). Based on the interaction between SidI<sub>CA68</sub> and eEF1A,  
198 we also quantified translation in the presence of increasing concentrations of His<sub>6</sub>-SidI<sub>CA68</sub>. We  
199 found that His<sub>6</sub>-SidI<sub>CA68</sub> significantly decreased translation at concentrations up to 25-fold greater  
200 than SidI (**Fig 6B**), suggesting that this truncation retains some activity; however, SidI<sub>CA68</sub>-  
201 mediated translation inhibition is modest in comparison to an equal amount of SidI despite the  
202 ability to interact with eEF1A (**Fig 4B, Fig S5**). These data further confirm that interaction with  
203 eEF1A is insufficient for SidI-mediated translation inhibition (12).

204

205 *SidI is a GDP-dependent glycosyltransferase.*

206 Like many other bacterial effectors, the primary amino acid sequence of SidI does not have  
207 obviously conserved motifs. Therefore, to gain insight into the putative function of SidI, we used  
208 a variety of computational methods to predict the structure and function of SidI. Though very  
209 low primary sequence identity was present in the templates used, the HHPred webserver (23),  
210 the Phyre2 webserver (24), the Raptor-X webserver (20), and the I-TASSER webserver (25–27) all  
211 produced models of various lengths, but with the same fold for overlapping regions. A DALI  
212 search (28) for structural homologs against each of these models revealed that amino acid residues  
213 368-868 of SidI have predicted structural homology to multiple bacterial and eukaryotic  
214 glycosyltransferases with GT-B folds, including PimB, a GDP-mannose-dependent  
215 mannosyltransferase (**Table S1, Fig S6**). Orthogonally, the Ginzu domain parser on the Robetta  
216 server also predicted the presence of a glycosyltransferase domain (29). Based on the consensus  
217 between orthogonal computational approaches, we hypothesized that SidI possesses GDP-  
218 dependent glycosyltransferase activity and that GDP-mannose could be a substrate. To test this  
219 hypothesis, we utilized a functional luminescence-based assay to quantify cleavage of GDP-  
220 mannose (see *Materials and Methods*). As a control, we also evaluated the ability of SusF, which  
221 does not have predicted glycosyltransferase activity, to cleave GDP-mannose. We observed high  
222 levels of free GDP only following incubation of recombinant His<sub>6</sub>-SidI with GDP-mannose,  
223 suggesting that SidI indeed possesses GDP-dependent glycosyltransferase activity (**Fig 7A**). We  
224 further investigated whether SidI glycosyltransferase activity was specific to GDP-sugars and  
225 evaluated its ability to cleave UDP-glucose, which is cleaved by Lgt1-3 (18, 30). SidI was capable  
226 of cleaving UDP-glucose, but far less efficiently than GDP-mannose (**Fig 7B**), suggesting that

227 GDP-mannose is the preferred substrate. Together, these data suggest that SidI functions  
228 specifically as a GDP-dependent glycosyltransferase.

229 The entire predicted GDP-dependent glycosyltransferase domain of SidI is encoded by amino  
230 acids 350-874, which is encompassed within SidI<sub>CA68</sub> truncation (**Fig 4A**). To determine whether  
231 SidI<sub>CA68</sub> alone is sufficient to cleave GDP-mannose, we incubated His<sub>6</sub>-SidI<sub>CA68</sub> with GDP-mannose  
232 and quantified generation of free GDP. Full-length SidI and SidI<sub>N</sub>, which is not predicted to  
233 possess glycosyltransferase activity, were included as controls. Neither SidI<sub>N</sub> nor SidI<sub>CA68</sub> were  
234 sufficient to cleave GDP-mannose (**Fig 7C**), suggesting that SidI enzymatic activity is dependent  
235 on both the N- and C-terminal domains.

236

### 237 *SidI enzymatic activity is dampened by SusF*

238 Based on the ability of SusF to suppress SidI-mediated translation inhibition, we hypothesized  
239 that SusF could regulate SidI-mediated GDP-dependent glycosyltransferase activity. Thus, SidI-  
240 mediated GDP-mannose cleavage in the presence of equimolar amounts of SusF was quantified  
241 as above. We found that SusF was sufficient to significantly decrease – but not inhibit – SidI GDP-  
242 dependent glycosyltransferase activity (\*\* $P < 0.01$ , **Fig 7D**). We further evaluated whether  
243 addition of molar excess of SusF would further decrease SidI glycosyltransferase activity;  
244 however, addition of up to a 5-fold molar excess of SusF to SidI was not sufficient to significantly  
245 inhibit SidI activity compared to equimolar quantities (**Fig 7E**). Thus, SusF dampens SidI  
246 glycosyltransferase activity *in vitro*.

247

## 248 **Discussion**

249 *Legionella pneumophila* is an opportunistic, intracellular pathogen that exploits host cell  
250 machinery to promote intracellular replication through the translocation of effector proteins. SidI  
251 is one of seven cytotoxic effectors that inhibit eukaryotic protein translation (SidI, SidL, Lgt1-3,  
252 LegK4, Lpg1489) (12, 13, 15, 18). Within this family of effectors, SidI is distinct as its regulation by  
253 the metaeffector Lpg2505 (SusF) is essential for intracellular replication (6). Our study aimed to  
254 explore the role of SusF in regulation of SidI function and elucidate potential mechanisms behind  
255 SidI-mediated toxicity. Here we demonstrate that SusF binds directly to SidI with high affinity  
256 and modulates both SidI-mediated translation inhibition and novel GDP-dependent  
257 glycosyltransferase activity, which has not been previously observed for a bacterial effector. We  
258 further demonstrate that SidI is able to simultaneously bind SusF and eEF1A, which interact with  
259 distinct regions of SidI. This work is the first to define the enzymatic activity of SidI and the  
260 contribution of SusF to SidI-mediated phenotypes.

261 *L. pneumophila* is reliant on the host cell-derived amino acids for intracellular replication  
262 (31). It can therefore be speculated that *L. pneumophila* utilizes multiple effector proteins to halt  
263 host protein synthesis at the elongation step in order to facilitate proteasomal degradation of  
264 partially folded polypeptides. The translation inhibiting effectors characterized to date have  
265 diverse functions. The effector Lgt1 was found to target the host elongation factor eEF1A and  
266 homology searches led to the discovery of the orthologous effectors Lgt2-3(19). The Lgt effectors  
267 function by glycosylation of eEF1A at Ser-53, which results in blockade of host protein synthesis

268 (32). The Lgts also glycosylate a eukaryotic release factor related protein (eRF3) and the Hsp70  
269 subfamily B suppressor 1 (Hbs1) (33, 34). Based on the function of Lgt1-3, attempts were made to  
270 identify SidI-mediated post-translational modification of eEF1A; however, no modifications were  
271 discovered (12). Although SidI was previously assumed to lack glycosyltransferase activity (12,  
272 35), we discovered that SidI, like the Lgts, is indeed able to cleave GDP-mannose, suggesting that  
273 SidI is a mannosyltransferase. However, future investigation is required to reveal the target of  
274 SidI's activity *in vivo* and the molecular mechanism by which SidI inhibits translation.

275 SidI induces the host stress response through formation of a complex between heat shock  
276 factor 1 (HSF1) and eEF1A(12). The formation of this complex in conjunction with a non-coding  
277 RNA promotes the binding of HSF1 to the heat shock element (HSE), inducing host cell *Hsp70*  
278 expression (12, 36). Notably, despite the upregulation of transcription, Hsp70 protein levels did  
279 not differ between infected and uninfected cells (12), likely due to robust translation inhibition  
280 by *L. pneumophila* effectors. A more recent study revealed that the eEF1A1 isoform facilitates  
281 expression of heat shock genes independently of its role in protein translation (37). Since SidI, but  
282 not Lgt1, induced expression of *Hsp70* in addition to eEF1A-mediated activation of the heat shock  
283 factor 1 (HSF1) transcription factor, it could be hypothesized that SidI modulates eEF1A to  
284 specifically amplify heat shock genes, which could enhance survival of *L. pneumophila* infected  
285 cells. Moreover, the effector LegK4 phosphorylates Hsp70, which results in loss of protein  
286 translation. It is tempting to envision a scenario whereby SidI and LegK4 function in concert to  
287 modulate host Hsp70 activity. The importance for modulation of heat shock proteins has also  
288 been demonstrated by previous observations that Hsp90 is essential for *L. pneumophila* replication

289 in *Acanthamoeba castellanii* (38). Further investigation is required to define the influence of SusF  
290 on SidI-mediated modulation of the heat shock response.

291 Regulation of effector function by metaeffectors is an essential component of the *L.*  
292 *pneumophila* virulence strategy. The first identified *L. pneumophila* metaeffector, LubX, functions  
293 as an E3 ubiquitin ligase that is translocated into the host cytosol at late stages of infection and  
294 catalyzes ubiquitination of the effector protein SidH, targeting it for proteasomal degradation (5).  
295 *L. pneumophila*  $\Delta$ *lubX* mutants replicate similarly to wild-type bacteria, suggesting that LubX is  
296 not individually required for intracellular replication in host cells examined (5). Like SusF, the  
297 metaeffector SidJ directly contributes to intracellular replication by suppressing the toxicity of the  
298 SidE family of effectors (SdeA, SidE, SdeB and SdeC) (7, 39). However, unlike SusF,  
299 overexpression of SidJ is toxic to eukaryotic cells (39). The SidE family of effectors also contributes  
300 directly to intracellular replication through a novel mechanism of phosphoribosyl-ubiquitin  
301 conjugation to host substrates (40–42). Unlike the SidE effectors, loss of *sidI* or the *sidI-lpg2505*  
302 operon has no effect on *L. pneumophila* intracellular growth (6), suggesting that SidI functions  
303 redundantly within macrophages. However, in the absence of SusF, SidI is deleterious to *L.*  
304 *pneumophila* intracellular replication (6), a phenotype not observed for any other effector.

305 Several modes of metaeffector function have been described. A large-scale screen by  
306 Urbanus and colleagues led to the discovery of 17 novel *L. pneumophila* metaeffectors that function  
307 to suppress the toxicity of their cognate effectors (4). They uncovered several mechanisms by  
308 which metaeffectors regulate their cognate effectors through abrogation of effector enzymatic  
309 activity *in vitro* (LegL1, SidP, LupA). Similarly, we found that SusF dampens SidI activity *in vitro*;

310 however, residual SidI activity is retained, suggesting that SusF functions to fine-tune SidI  
311 activity. Although we have not identified the *bona fide* substrate of SidI, our observation that SidI  
312 interacts with both SusF and eEF1A simultaneously at distinct regions suggests that SidI may  
313 modify eEF1A or use interaction with eEF1A to gain access to a host substrate. Future  
314 investigation will reveal the role of SusF in SidI function and how this contributes to *L.*  
315 *pneumophila* intracellular replication.

316           Through structural homology prediction and biochemical analysis, we revealed that SidI  
317 likely possesses GDP-dependent glycosyltransferase activity. Although we have not directly  
318 demonstrated the transfer of mannose to a substrate protein, it is unlikely that SidI functions only  
319 as a nucleotide-sugar hydrolase in the context of infection. Moreover, detection of free nucleotide  
320 liberation from nucleotide-sugar donors is a pre-requisite for transfer of glycans to substrate  
321 molecules and is an established method to identify glycosyltransferase activity without knowing  
322 the acceptor substrate (43). Our use of a luciferase-based assay eliminates the requirement for  
323 radioactive nucleotide-sugars.

324           Several *L. pneumophila* effectors function as glycosyltransferases, including the translation  
325 inhibitors Lgt1-3; however, none have been shown to utilize GDP-conjugated sugars. In fact,  
326 bacterial GDP-dependent glycosyltransferases seem to be involved primarily in biogenesis of cell  
327 surface structures (44–46). SidI has predicted structural homology to mycobacterial  
328 phosphatidylinositol mannosides (PIMs), which are GT-B glycosyltransferases (45, 47). To our  
329 knowledge, no other translocated bacterial effector has been demonstrated to have GDP-  
330 dependent glycosyltransferase activity. The primary site of protein glycosylation in eukaryotic



331 cells is the Golgi apparatus; however, nucleotide sugars, including GDP-mannose, are  
332 synthesized in the cytoplasm of eukaryotic cells prior to transport into the Golgi (48, 49). Thus,  
333 SidI likely hijacks cytoplasmic GDP-mannose prior to its translocation into the Golgi. Based on  
334 the relatively low abundance of individual effectors in *L. pneumophila* infected cells it is unlikely  
335 that SidI function influences glycoprotein production by host cells. Thus, SidI is a GDP-  
336 dependent glycosyltransferase and this activity is likely critical for SidI-mediated translation  
337 inhibition and cytotoxicity. Further biochemical and structure-function analysis will reveal the  
338 detailed molecular mechanism by which SidI functions, its *bona fide* substrate in host cells and  
339 how SusF regulates its activity to promote *L. pneumophila* intracellular replication.

340         In this study, we have revealed a direct high-affinity interaction between SidI and its  
341 metaeffector SusF, defined a novel enzymatic activity for SidI and uncovered that SusF can  
342 modulate SidI function *in vitro*. Our work has provided a foundation for future biochemical and  
343 cell biological studies to reveal how SidI functions to modulate host cell processes. The severe  
344 virulence defect resulting from expression of *sidI* in the absence of *susF* underlies the importance  
345 of defining the molecular mechanism of SidI-SusF function. Moreover, the lack of precedent for  
346 a bacterial GDP-dependent glycosyltransferase effector protein suggests that SidI possesses novel  
347 enzymatic activity, which must be regulated by SusF to promote *L. pneumophila* intracellular  
348 replication. Our future work will focus on uncovering this mechanism in order to gain critical  
349 insight into translation inhibition and metaeffector function.

350

351 **Materials and Methods**

352 Bacterial strains, cell culture, growth conditions and reagents.

353 *Escherichia coli* strains used for cloning (Top10; Invitrogen) and protein expression [BL21 (DE3); a  
354 gift from Dr. Craig Roy, Yale University] were maintained in Luria-Bertani (LB) medium  
355 supplemented with antibiotics as appropriate for plasmid selection [50  $\mu\text{g mL}^{-1}$  kanamycin  
356 (GoldBio), 100  $\mu\text{g mL}^{-1}$  ampicillin (GoldBio) and 25  $\mu\text{g mL}^{-1}$  chloramphenicol (GoldBio)].  
357 *Legionella pneumophila* Philadelphia-1 Lp01 (50) and  $\Delta dotA$  (51) strains were cultured on  
358 supplemented charcoal-N (2-acetamido)-2-aminoethanesulfonic acid (ACES)-buffered yeast  
359 extract (CYE) and grown at 37°C as described previously (52, 53). CYE was supplemented with  
360 10  $\mu\text{g mL}^{-1}$  chloramphenicol for plasmid maintenance as required. Protein expression in *E. coli*  
361 and *L. pneumophila* was induced with 1 mM isopropyl- $\beta$ -D-1-thiogalactopyranoside (IPTG)  
362 (GoldBio).

363 All mammalian cells were grown at 37°C/5% CO<sub>2</sub> for up to 30 passages. HEK 293 cells were  
364 cultured in Dulbecco's Modified Eagle Medium (DMEM; Gibco) supplemented with 10% heat-  
365 inactivated fetal bovine serum (HIFBS; Gibco). CHO Fc $\gamma$ RII cells (54) (a gift from Dr. Craig Roy)  
366 were cultured in MEM $\alpha$  (Gibco) supplemented with 10% HIFBS.

367 Unless otherwise specified, all chemicals were obtained from MilliporeSigma (St Louis, MO).  
368 Oligonucleotide primers used in this study are listed in **Table 1**.

369

370 Molecular cloning, plasmid construction and generation of *Legionella* strains.

371 *Legionella pneumophila* Lp01 gDNA was isolated using the Illustra genomicPREP DNA isolation  
372 spin kit (GE Healthcare) and was used as a template for cloning *sidI* and *susF* into the indicated  
373 plasmid vectors. For recombinant protein production, *sidI* was amplified using primer pairs  
374 SidIBamHI-F/SidINotI-F and cloned as a BamHI/NotI fragment into pGEX-6P-1 (GE Healthcare)  
375 and pT7HMT (55). *susF* was amplified using primer pairs SusFBgIII-F/SusFNotI-R and cloned as  
376 a BgIII/NotI fragment into BamHI/NotI-digested pGEX-6P-1 and pcDNA4T/O-3xFLAG (56). For  
377 cloning into pT7HMT, *susF* was amplified using SusFSall-F/SusFNotI-R primer pairs and cloned  
378 as a Sall/NotI fragment. For generation of SidI truncations, the regions of interest were amplified  
379 with primer pairs SidIBamHI-F/SidINNotI-R (SidI<sub>N</sub>), SidICBamHI-F/SidINotI-R (SidI<sub>C</sub>), or  
380 SidICBamHI-F/SidICΔ68NotI-R (SidI<sub>CA68</sub>) and cloned as BamHI/NotI fragments into pT7HMT or  
381 pGEX-6P-1. For generation of *pcyaA::sidI<sub>RP</sub>*, *sidI<sub>R453P</sub>* was amplified from pSR47S::*sidI<sub>R453P</sub>* (6) with  
382 SidIBamHI-F2/SidIPstI-R and cloned as a BamHI/PstI fragment into *pcyaA* (21). DNA sequences  
383 were confirmed by Sanger sequencing (GENEWIZ, South Plainfield, NJ).

384 *L. pneumophila* Lp01 wild-type and  $\Delta dotA$  producing CyaA-SidI constructs were generated by  
385 electroporation of *pcyaA::sidI<sub>RP</sub>* into competent strains using a BioRad Gene Pulser at 2.4 kV, 200  
386  $\Omega$ , and 0.25  $\mu$ F and plated on CYE supplemented with 10  $\mu$ g mL<sup>-1</sup> chloramphenicol. CyaA-SidI  
387 production was confirmed by Western blot as described below. *L. pneumophila* strains harboring  
388 *pcyaA::ralF* (21) were a gift from Dr. Craig Roy (Yale University).

389

390 Transfection and selection of stable tissue culture cells

391 HEK 293 cells were transfected with pcDNA4T/O-3FLAG::*susF* using FuGENE HD (Roche)  
392 transfection reagent according to manufacturers' instructions. At 48 h post-transfection, cells 500  
393  $\mu\text{g mL}^{-1}$  zeocin (Invitrogen) was added to culture medium and this selection was maintained for  
394 10 days. Subsequently, cells were maintained in 200  $\mu\text{g mL}^{-1}$  zeocin and production of 3FLAG-  
395 SusF was confirmed by Western blotting, as described.

396

### 397 Recombinant protein expression and purification

398 Overnight *E. coli* BL21 (DE3) cultures were sub-cultured at 1:100 for 3 h in LB supplemented with  
399 the appropriate antibiotics followed by induction of protein expression with 1 mM IPTG, and  
400 induced at 16°C overnight. Bacterial cultures were centrifuged at 4,200 r.c.f. for 5 min at 4°C and  
401 washed with ice-cold PBS followed by incubation in bacterial lysis buffer [50 mM Tris pH 8, 100  
402 mM NaCl, 1 mM ethylenediaminetetraacetic acid (EDTA), 200  $\mu\text{g mL}^{-1}$  lysozyme, 2 mM  
403 dithiothreitol (DTT), 10  $\mu\text{g mL}^{-1}$  DNase, and complete protease inhibitor] for 30 min on ice.  
404 Bacteria were sonicated on ice followed by centrifugation at 17,000 r.c.f. for 30 min at 4°C.  
405 Clarified bacterial lysates were incubated with either Ni-NTA beads plus 15 mM imidazole (His-  
406 tag) or Glutathione Agarose beads (GST-tag) for 1-2 h at 4°C with rotation. For His-tagged  
407 proteins, Ni-NTA agarose beads were transferred to 10 mL polyprep chromatography columns  
408 (BioRad) and washed with 20 mL of ice-cold wash buffer (50 mM Tris pH 8, 100 mM NaCl, 1 mM  
409 EDTA, 40 mM imidazole) followed by elution in 7 mL of elution buffer (50 mM Tris pH 8, 100  
410 mM NaCl, 1 mM EDTA, 200 mM imidazole). For GST-tagged proteins, glutathione agarose beads  
411 were transferred to a 10 mL polyprep chromatography column and washed with 20 mL wash

412 buffer I (PBS, 0.05% Triton X-100), followed by wash buffer II (PBS, 0.05% Triton X-100, 0.5 M  
413 NaCl) and eluted in GST elution buffer (50 mM Tris pH 9.5, 10 mM glutathione). Protein eluates  
414 were visualized by SDS-PAGE and Coomassie brilliant blue staining. Elution fractions containing  
415 protein were combined, dialyzed into PBS and quantified by Bradford Assay (Thermo Scientific).

416 In some cases, the poly-histidine tag was removed from recombinant proteins by site-  
417 specific proteolysis using Tobacco Etch Virus protease. Following digestion as previously  
418 described (55), the sample was reappplied to a Ni-NTA beads and the unbound fraction containing  
419 the target protein was collected. Samples were further purified by gel filtration chromatography  
420 using either a Superdex 75 (26/60) or Superdex 200 (26/60) column attached to an AKTA-format  
421 FPLC (GE Healthcare) and PBS as a running buffer. Elution fractions containing protein were  
422 analyzed by SDS-PAGE and Coomassie brilliant blue staining, as described above.

423

#### 424 Affinity chromatography for protein-protein interaction

425 Overnight *E. coli* cultures grown in LB plus appropriate antibiotic were sub-cultured 1:100 into  
426 20 mL LB and grown at 37°C for 3 h followed by induction with 1 mM IPTG for 4 h. Cultures  
427 were centrifuged for 10 min at 1500 r.c.f., washed with ice-cold PBS and pelleted in 1 mL aliquots  
428 prior to storage at -20°C for <72 hours until use. Pellets were re-suspended in 1 mL of cold lysis  
429 buffer (50 mM Tris pH 8, 100 mM NaCl, 1 mM EDTA) supplemented with 200 µg mL<sup>-1</sup> lysozyme,  
430 and complete protease inhibitor and incubated on ice for 30 min. Two millimolar DTT was added  
431 to lysates before sonicating on ice. Lysates were then clarified by centrifugation at 12,600 r.c.f. for  
432 15 min at 4°C. Supernatants were collected in fresh, pre-chilled microcentrifuge tubes.

433 Supernatants were added to either pre-equilibrated Ni-NTA magnetic beads or magnetic  
434 glutathione agarose beads following manufacturer's protocol (Pierce) for binding His- or GST-  
435 tagged fusion proteins, respectively. After the initial batch binding, beads were washed 2x with  
436 wash buffer [Ni-NTA: 50 mM Na<sub>3</sub>PO<sub>4</sub>, 300 mM NaCl, 15 mM imidazole, 0.05% Tween-20, pH 8;  
437 Glutathione: 125 mM Tris-Cl, 150 mM NaCl, 1mM DTT, 1 mM EDTA, pH 7.4] prior to addition  
438 of recombinant protein or subsequent cell lysate and batch binding for 1 h at 4°C with rotation.  
439 Beads were washed 2x with wash buffer before adding the final cell lysate or recombinant protein  
440 and incubating for 1 h at 4°C with rotation. Following binding, beads were washed 2x with wash  
441 buffer and transferred to fresh, pre-chilled 1.5 mL microcentrifuge tubes and resuspended in 25  
442 µL of 3x Laemmli sample buffer and boiled for 10 min. Samples were analyzed by SDS-PAGE  
443 and Coomassie brilliant blue or Western Blot, as indicated.

444 For experiments to examine eEF1A binding, lysates were derived from either HEK293T or  
445 HEK293 3FLAG-SusF cells grown to ≥70% confluence on tissue culture (TC) treated dishes. Cells  
446 were washed 1x with ice-cold PBS and lysed in 1 mL of mammalian lysis buffer [1% NP-40 (v/v),  
447 150 mM NaCl, 20 mM Tris-Cl pH 7.5, 10 mM Na<sub>4</sub>P<sub>2</sub>O<sub>7</sub>, 50 mM NaF, and complete protease  
448 inhibitor]. Lysates were collected in pre-chilled, 1.5 mL centrifuge tubes and centrifuged at 11,000  
449 r.c.f. for 20 min at 4°C. Supernatants were collected in pre-chilled, 1.5 mL centrifuge tubes and  
450 stored on ice until use.

451

452 CyaA effector translocation assay

453 Translocation of CyaA fusion proteins was performed as described (21). Briefly, CHO FcγrII cells  
454 (a gift from Dr. Craig Roy) were seeded into 24-well plates at 1x10<sup>5</sup> cells per well 24 h prior to  
455 infection. Cells were infected at a multiplicity of infection (MOI) of 30 with *L. pneumophila* Lp01  
456 wild-type or  $\Delta dotA$  that had been cultured on CYE supplemented with 10 μg mL<sup>-1</sup>  
457 chloramphenicol and 1 mM IPTG followed by opsonization by incubation for 30 min with an α-  
458 *L. pneumophila* antibody (Invitrogen, PA17227; 1:1000) at RT. Cell culture media was  
459 supplemented with 1 mM IPTG to ensure expression of CyaA-SidI fusion protein. Infected cells  
460 were incubated for 1-2 hours at 37°C/5% CO<sub>2</sub> followed by aspiration of culture media and  
461 washing 3 times with ice-cold PBS. Cells were lysed for 30 minutes in 200 μL of ice-cold lysis  
462 buffer (50 mM HCl, 0.1% Triton-X100) with rocking at 4°C. Samples were either stored at -80°C  
463 until use or immediately mixed with 12 μL 0.5M NaOH in 95% ethanol and centrifuged for 5 min  
464 at 11,000 r.c.f. Supernatants were dried in a Speed Vac and stored at -80°C until use. cAMP was  
465 quantified using a cAMP Direct Biotrak EIA (non-acetylation) kit (GE Healthcare). Briefly, dried  
466 samples were resuspended in 250 μL Assay Buffer and ELISA was performed following  
467 manufacturer's protocol. Absorbance at 655 nm was read in a Victor 2 microplate reader  
468 (PerkinElmer).

469

#### 470 *In vitro* protein translation assay

471 Translation assays were performed using the Promega Flexi® Rabbit Reticulocyte Lysate System  
472 (RLL; L4540) following manufacturer's protocol. Briefly, a master mix of RLL was generated and  
473 aliquoted into individual tubes. Four nanograms of purified His<sub>6</sub>- SidI (see above) were added as

474 indicated. Purified recombinant (untagged) SusF was added at the indicated concentrations.  
475 Proteins were equilibrated to room temperature before use. All reactions were brought to 50  $\mu$ L  
476 with ultra-pure water. Reactions were mixed by pipetting and briefly centrifuged before  
477 incubation at 30°C for 90 min. Translation of *Firefly* luciferase mRNA (Promega) was quantified  
478 using a Victor 2 microplate reader (PerkinElmer).

479

#### 480 Glycosyltransferase activity assay

481 Glycosyltransferase activity was evaluated using GDP- or UDP-Glo™ Glycosyltransferase Assay  
482 kits (Promega) with GDP-mannose (VA1095) or UDP-glucose (V6991), respectively, following  
483 manufacturers' recommendations. Briefly, 5  $\mu$ g of purified His<sub>6</sub>-SidI and/or molar equivalent (or  
484 excess as indicated) SusF were added to 100  $\mu$ L of 50mM Tris pH 7.4 with 10  $\mu$ M of GDP-mannose  
485 or UDP-glucose. Ten  $\mu$ M GDP or UDP were used as controls as indicated. Reactions were carried  
486 out for an hour at 37°C and quantification of free nucleotide (GDP or UDP) was achieved by  
487 addition of GDP- or UDP-Glo™ nucleotide detection reagent following manufacturers'  
488 instructions and analyzed via luminescence using a Victor 2 microplate reader (PerkinElmer).

489

#### 490 SDS-PAGE and Western Blot

491 Boiled protein samples were loaded onto either 4-20% gradient SDS-PAGE gels (BioRad), 12% or  
492 15% SDS-PAGE gels. Following electrophoresis, proteins were visualized with Coomassie  
493 brilliant blue or transferred to PVDF membranes using a BioRad wet transfer cell. Membranes



494 were incubated with blocking buffer [5% nonfat milk powder dissolved in tris-buffered saline-  
495 0.1% Tween 20 (TBST)]. Primary antibodies [ $\alpha$ -eEF1A (#2551S Cell Signaling Technology),  $\alpha$ -Flag-  
496 M2 (Sigma), or  $\alpha$ -CyaA[3D1] (#EG800 Kerafast)] were used 1:1000 in blocking buffer and detected  
497 with HRP-conjugated secondary antibodies (1:5000; ThermoFisher). Membranes were washed,  
498 incubated with ECL substrate (GE Amersham) and imaged by chemiluminescence using an  
499 Azure Biosystems c300 Darkroom Replacer.

500

### 501 Surface Plasmon Resonance

502 Direct binding of His<sub>6</sub>-SidI to SusF was assessed by SPR using a Biacore T-200 instrument (GE  
503 Healthcare) at 25 °C, according to the general methods previously described (57). Briefly, all  
504 experiments were carried out in a running buffer of HBS-T (20 mM HEPES (pH 7.4), 140 mM  
505 NaCl, and 0.005% (v/v) Tween-20 and a flow-rate of 30  $\mu$ l/min (57). SusF (50  $\mu$ g mL<sup>-1</sup> in 10 mM  
506 acetate, pH 4.5) was immobilized to a final density of 1063 RU on one flow cell of a CMD-200M  
507 surface (XanTec Bioanalytics, GmbH; Dusseldorf, Germany) using standard NHS/EDC coupling.  
508 A reference surface was prepared in a similar manner by ethanolamine quenching of NHS/EDC-  
509 activated flow cell. Experimental sensorgrams of His<sub>6</sub>-SidI binding to immobilized SusF were  
510 obtained in reference-corrected, single-cycle mode using sequential concentrations of 0.8, 4, 20,  
511 100, and 500 nM His<sub>6</sub>-SidI. Each association phase consisted of 2 min sample injection, followed  
512 by a 1.5 min dissociation phase, except for the final injection which incorporated a 60 min  
513 dissociation phase for more accurate determination of the dissociation rate. Kinetic analysis was

514 performed using Biacore T-200 Evaluation Software v3.1 (GE Healthcare). Sensorgrams were  
515 analyzed using both Langmuir and Two-State Reaction binding models and a local value of  $R_{max}$ .

516

### 517 Analytical Gel Filtration Chromatography

518 Samples of recombinant proteins were characterized by analytical-scale gel-filtration  
519 chromatography as a mean of assessing their apparent molecular weight. All samples and  
520 standards (500  $\mu$ l total volume) were separated on a Superdex 200 10/300 column (GE Healthcare)  
521 attached to an AKTA-format FPLC system using a flow-rate of 0.5 ml/min and PBS as a running  
522 buffer. Fractions of 1 ml were collected for subsequent analysis by SDS-PAGE and Coomassie  
523 brilliant blue, as described above.

524

### 525 Molecular Modeling

526 Homology models were created using four different servers, using the full sequence of SidI as  
527 inputs and default parameters for each server. Using HHPred (23), a number of templates were  
528 identified for residues 376 to 868, and the top 25 templates were forwarded for modeling. Using  
529 Phyre2 (24), a smaller region, residues 585 to 763, was chosen for modeling. Raptor-X (20) and I-  
530 TASSER (25–27) both produce full-length models. Raptor-X predicted residues 350 to 870 to be a  
531 domain. I-TASSER presented five models of low confidence, one of which contained a  
532 glycosyltransferase domain with a GT-B fold, which was selected as the working model.

533

534 Statistical Analysis

535 Statistical analysis was performed with GraphPad Prism software using Students' t-test, as  
536 indicated, with a 95% confidence interval. For all experiments, data are expressed as mean  $\pm$   
537 standard deviation (s.d.) of samples in triplicates.

538

539 **Acknowledgements**

540 We thank Drs. Philip Hardwidge and Mary Weber for critical reading of the manuscript and Dr.  
541 Craig Roy for providing strains and cell lines. This work was funded through an NIH NIGMS  
542 COBRE Research Project Award (P20GM113117; to SRS), a Kansas-INBRE Developmental  
543 Research Project Award (P20GM103418; to SRS), a Kansas State University College of Arts and  
544 Sciences Undergraduate Research Award (to TJB), a Kansas-INBRE Semester Scholar Award  
545 (P20GM103418; to AEP), and start-up funds from Kansas State University (to SRS).

546

547 **References**

548

549 1. Horwitz M. 1983. Formation of a novel phagosome by the Legionnaires' disease bacterium  
550 (*Legionella pneumophila*) in human monocytes. *The Journal of Experimental Medicine* 158:1319  
551 1331.

552

553 2. Ensminger AW. 2016. *Legionella pneumophila*, armed to the hilt: justifying the largest arsenal of  
554 effectors in the bacterial world. *Curr Opin Microbiol* 29:74 80.

555

556 3. Ghosh S, O'Connor TJ. 2017. Beyond Paralogs: The Multiple Layers of Redundancy in  
557 Bacterial Pathogenesis. *Front Cell Infect Microbiol* 7:467.

558

559 4. Urbanus ML, Quaile AT, Stogios PJ, Morar M, Rao C, Leo R, Evdokimova E, Lam M, Oatway

- 560 C, Cuff ME, Osipiuk J, Michalska K, Nocek BP, Taipale M, Savchenko A, Ensminger AW. 2016.  
561 Diverse mechanisms of metaeffector activity in an intracellular bacterial pathogen, *Legionella*  
562 *pneumophila*. Mol Syst Biol 12:893.  
563
- 564 5. Kubori T, Shinzawa N, Kanuka H, Nagai H. 2010. *Legionella* metaeffector exploits host  
565 proteasome to temporally regulate cognate effector. Plos Pathog 6:e1001216.  
566
- 567 6. Shames SR, Liu L, Havey JC, Schofield WB, Goodman AL, Roy CR. 2017. Multiple *Legionella*  
568 *pneumophila* effector virulence phenotypes revealed through high-throughput analysis of  
569 targeted mutant libraries. Proc National Acad Sci 63:201708553.  
570
- 571 7. Jeong K, Sexton JA, Vogel JP. 2015. Spatiotemporal Regulation of a *Legionella pneumophila*  
572 T4SS Substrate by the Metaeffector SidJ. Plos Pathog 11:1 22.  
573
- 574 8. Liu Y, Luo Z-Q. 2007. The *Legionella pneumophila* effector SidJ is required for efficient  
575 recruitment of endoplasmic reticulum proteins to the bacterial phagosome. Infect Immun 75:592  
576 603.  
577
- 578 9. Black MH, Osinski A, Gradowski M, Servage KA, Pawłowski K, Tomchick DR, Tagliabracci  
579 VS. 2019. Bacterial pseudokinase catalyzes protein polyglutamylation to inhibit the SidE-family  
580 ubiquitin ligases. Science 364:787–792.  
581
- 582 10. Bhogaraju S, Bonn F, Mukherjee R, Adams M, Pfliegerer MM, Galej WP, Matkovic V, Lopez-  
583 Mosqueda J, Kalayil S, Shin D, Dikic I. 2019. Inhibition of bacterial ubiquitin ligases by SidJ-  
584 calmodulin catalysed glutamylation. Nature 572:382–386.  
585
- 586 11. Gan N, Zhen X, Liu Y, Xu X, He C, Qiu J, Liu Y, Fujimoto GM, Nakayasu ES, Zhou B, Zhao  
587 L, Puvar K, Das C, Ouyang S, Luo Z-Q. 2019. Regulation of phosphoribosyl ubiquitination by a  
588 calmodulin-dependent glutamylase. Nature 572:387–391.  
589
- 590 12. Shen X, Banga S, Liu Y, Xu L, Gao P, Shamovsky I, Nudler E, Luo Z-Q. 2009. Targeting  
591 eEF1A by a *Legionella pneumophila* effector leads to inhibition of protein synthesis and induction  
592 of host stress response. Cell Microbiol 11:911 926.  
593
- 594 13. Guo Z, Stephenson R, Qiu J, Zheng S, Luo Z-Q. 2014. A *Legionella* effector modulates host  
595 cytoskeletal structure by inhibiting actin polymerization. Microbes Infect 16:225–236.  
596
- 597 14. Fontana MF, Banga S, Barry KC, Shen X, Tan Y, Luo Z-Q, Vance RE. 2011. Secreted bacterial  
598 effectors that inhibit host protein synthesis are critical for induction of the innate immune  
599 response to virulent *Legionella pneumophila*. Plos Pathog 7:e1001289.  
600
- 601 15. Barry KC, Fontana MF, Portman JL, Dugan AS, Vance RE. 2013. IL-1 $\alpha$  signaling initiates the  
602 inflammatory response to virulent *Legionella pneumophila* *in vivo*. J Immunol 190:6329 6339.

- 603  
604 16. Moss SM, Taylor IR, Ruggero D, Gestwicki JE, okat K, Mukherjee S. 2019. A *Legionella*  
605 *pneumophila* Kinase Phosphorylates the Hsp70 Chaperone Family to Inhibit Eukaryotic Protein  
606 Synthesis. *Cell Host Microbe* 25:454 462.e6.  
607
- 608 17. Belyi Y, Niggeweg R, Opitz B, Vogelsgesang M, Hippenstiel S, Wilm M, Aktories K. 2006.  
609 *Legionella pneumophila* glucosyltransferase inhibits host elongation factor 1A. *Proc National*  
610 *Acad Sci* 103:16953 16958.  
611
- 612 18. Belyi Y, Tabakova I, Stahl M, Aktories K. 2008. Lgt: a family of cytotoxic glucosyltransferases  
613 produced by *Legionella pneumophila*. *J Bacteriol* 190:3026 3035.  
614
- 615 19. Tzivelekidis T, Jank T, Pohl C, Schlosser A, Rospert S, Knudsen CR, Rodnina MV, Belyi Y,  
616 Aktories K. 2011. Aminoacyl-tRNA-charged eukaryotic elongation factor 1A is the bona fide  
617 substrate for *Legionella pneumophila* effector glucosyltransferases. *Plos One* 6:e29525.  
618
- 619 20. Källberg M, Wang H, Wang S, Peng J, Wang Z, Lu H, Xu J. 2012. Template-based protein  
620 structure modeling using the RaptorX web server. *Nat Protoc* 7:1511 1522.  
621
- 622 21. Nagai H, Cambronne ED, Kagan JC, Amor J, Kahn RA, Roy CR. 2005. A C-terminal  
623 translocation signal required for Dot/Icm-dependent delivery of the *Legionella* RalF protein to  
624 host cells. *P Natl Acad Sci Usa* 102:826 831.  
625
- 626 22. Huang L, Boyd D, Amyot WM, Hempstead AD, Luo Z-Q, O'Connor TJ, Chen C, Machner  
627 M, Montminy T, Isberg RR. 2011. The E Block motif is associated with *Legionella pneumophila*  
628 translocated substrates. *Cell Microbiol* 13:227 245.  
629
- 630 23. Söding J, Biegert A, Lupas AN. 2005. The HHpred interactive server for protein homology  
631 detection and structure prediction. *Nucleic Acids Res* 33:W244 8.  
632
- 633 24. Kelley LA, Mezulis S, Yates CM, Wass MN, Sternberg MJ. 2015. The Phyre2 web portal for  
634 protein modeling, prediction and analysis. *Nat Protoc* 10:845–858.  
635
- 636 25. Yang J, Zhang Y. 2015. I-TASSER server: new development for protein structure and  
637 function predictions. *Nucleic Acids Res* 43:W174–W181.  
638
- 639 26. Yang J, Yan R, Roy A, Xu D, Poisson J, Zhang Y. 2015. The I-TASSER Suite: protein structure  
640 and function prediction. *Nat Methods* 12:7–8.  
641
- 642 27. Roy A, Kucukural A, Zhang Y. 2010. I-TASSER: a unified platform for automated protein  
643 structure and function prediction. *Nat Protoc* 5:725–738.  
644
- 645 28. Holm L. 2019. Benchmarking Fold Detection by DaliLite v.5. *Bioinform Oxf Engl.* 1-2

- 646  
647 29. Kim DE, Chivian D, Malmström L, Baker D. 2005. Automated prediction of domain  
648 boundaries in CASP6 targets using GinzU and RosettaDOM. *Proteins Struct Funct Bioinform*  
649 61:193–200.
- 650  
651 30. Belyi Y, Jank T, Aktories K. 2013. Cytotoxic glucosyltransferases of *Legionella pneumophila*.  
652 *Curr Top Microbiol* 376:211–226.
- 653  
654 31. Price CT, Al-Quadani T, Santic M, Rosenshine I, Kwaik Y. 2011. Host proteasomal  
655 degradation generates amino acids essential for intracellular bacterial growth. *Science* 334:1553  
656 1557.
- 657  
658 32. Belyi Y, Tartakovskaya D, Tais A, Fitzke E, Tzivelekidis T, Jank T, Rospert S, Aktories K.  
659 2012. Elongation factor 1A is the target of growth inhibition in yeast caused by *Legionella*  
660 *pneumophila* glucosyltransferase Lgt1. *J Biol Chem* 287:26029–26037.
- 661  
662 33. Dever TE, Green R. 2012. The Elongation, Termination, and Recycling Phases of Translation  
663 in Eukaryotes. *Csh Perspect Biol* 4:a013706.
- 664  
665 34. Belyi Y, Stahl M, Sovkova I, Kaden P, Luy B, Aktories K. 2009. Region of elongation factor  
666 1A1 involved in substrate recognition by *Legionella pneumophila* glucosyltransferase Lgt1:  
667 identification of Lgt1 as a retaining glucosyltransferase. *J Biol Chem* 284:20167–20174.
- 668  
669 35. Rolando M, Buchrieser C. 2014. *Legionella pneumophila* type IV effectors hijack the  
670 transcription and translation machinery of the host cell. *Trends Cell Biol* 24:771–778.
- 671  
672 36. Shamovsky I, Ivannikov M, Kandel ES, Gershon D, Nudler E. 2006. RNA-mediated response  
673 to heat shock in mammalian cells. *Nature* 440:556–560.
- 674  
675 37. Vera M, Pani B, Griffiths LA, Muchardt C, Abbott CM, Singer RH, Nudler E. 2014. The  
676 translation elongation factor eEF1A1 couples transcription to translation during heat shock  
677 response. *Elife* 3:e03164.
- 678  
679 38. Yan L, Cerny RL, Cirillo JD. 2004. Evidence that hsp90 is involved in the altered interactions  
680 of *Acanthamoeba castellanii* variants with bacteria. *Eukaryot Cell* 3:567–578.
- 681  
682 39. Havey JC, Roy CR. 2015. Toxicity and SidJ-Mediated Suppression of Toxicity Require  
683 Distinct Regions in the SidE Family of *Legionella pneumophila* Effectors. *Infect Immun* 83:3506  
684 3514.
- 685  
686 40. Wang Y, Shi M, Feng H, Zhu Y, Liu S, Gao A, Gao P. 2018. Structural Insights into Non-  
687 canonical Ubiquitination Catalyzed by SidE. *Cell* 173:1231–1243.e16.
- 688

- 689 41. Dong Y, Mu Y, Xie Y, Zhang Y, Han Y, Zhou Y, Wang W, Liu Z, Wu M, Wang H, Pan M, Xu  
690 N, Xu C-Q, Yang M, Fan S, Deng H, Tan T, Liu X, Liu L, Li J, Wang J, Fang X, Feng Y. 2018.  
691 Structural basis of ubiquitin modification by the *Legionella* effector SdeA. *Nature* 557:674–678.  
692
- 693 42. Qiu J, Sheedlo MJ, Yu K, Tan Y, Nakayasu ES, Das C, Liu X, Luo Z-Q. 2016. Ubiquitination  
694 independent of E1 and E2 enzymes by bacterial effectors. *Nature* 533:120–124.  
695
- 696 43. Sethi MK, Buettner FF, Ashikov A, Bakker H. 2013. Glycosyltransferases, *Methods and*  
697 *Protocols* 307–320.  
698
- 699 44. Mishra AK, Krumbach K, Rittmann D, Batt SM, Lee O, De S, Frunzke J, Besra GS, Eggeling  
700 L. 2012. Deletion of manC in *Corynebacterium glutamicum* results in a phospho-myo-inositol  
701 mannoside- and lipoglycan-deficient mutant. *Microbiology+* 158:1908–1917.  
702
- 703 45. Rodrigo-Unzueta A, Martínez MA, Comino N, Alzari PM, Chenal A, Guerin ME. 2016.  
704 Molecular Basis of Membrane Association by the Phosphatidylinositol Mannosyltransferase  
705 PimA Enzyme from Mycobacteria. *J Biol Chem* 291:13955–13963.  
706
- 707 46. Panda S, Saxena S, Guruprasad L. 2019. Homology modeling, docking and structure-based  
708 virtual screening for new inhibitor identification of *Klebsiella pneumoniae* heptosyltransferase-III.  
709 *J Biomol Struct Dyn* 1–16.  
710
- 711 47. Batt SM, Jabeen T, Mishra AK, Veerapen N, Krumbach K, Eggeling L, Besra GS, Fütterer K.  
712 2010. Acceptor Substrate Discrimination in Phosphatidyl-myo-inositol Mannoside Synthesis  
713 STRUCTURAL AND MUTATIONAL ANALYSIS OF MANNOSYLTRANSFERASE  
714 CORYNEBACTERIUM GLUTAMICUM PimB'. *J Biol Chem* 285:37741–37752.  
715
- 716 48. Coates S, Gurney T, Sommers L, Yeh M, Hirschberg C. 1980. Subcellular localization of sugar  
717 nucleotide synthetases. *J Biol Chem* 255:9225–9.  
718
- 719 49. Kawakita M, Ishida N, Miura N, Sun-Wada G, Yoshioka S. 1998. Nucleotide sugar  
720 transporters: elucidation of their molecular identity and its implication for future studies. *J*  
721 *Biochem* 123:777–85.  
722
- 723 50. Berger K, Isberg R. 1993. Two distinct defects in intracellular growth complemented by a  
724 single genetic locus in *Legionella pneumophila*. *Mol Microbiol* 7:7–19.  
725
- 726 51. Roy CR, Berger KH, Isberg RR. 1998. *Legionella pneumophila* DotA protein is required for  
727 early phagosome trafficking decisions that occur within minutes of bacterial uptake. *Mol*  
728 *Microbiol* 28:663–674.  
729
- 730 52. Feeley J, Gibson R, Gorman G, Langford N, Rasheed J, Mackel D, Baine W. 1979. Charcoal-  
731 yeast extract agar: primary isolation medium for *Legionella pneumophila*. *J Clin Microbiol* 10:437

732 441.

733

734 53. Saito A, Rolfe R, Edelstein P, Finegold S. 1981. Comparison of liquid growth media for  
735 *Legionella pneumophila*. J Clin Microbiol 14:623–627.

736

737 54. Joiner K, Fuhrman S, Miettinen H, Kasper L, Mellman I. 1990. *Toxoplasma gondii*: fusion  
738 competence of parasitophorous vacuoles in Fc receptor-transfected fibroblasts. Science 249:641–  
739 646.

740

741 55. Geisbrecht BV, Bouyain S, Pop M. 2006. An optimized system for expression and  
742 purification of secreted bacterial proteins. Protein Expres Purif 46:23–32.

743

744 56. Ingmundson A, Delprato A, Lambright DG, Roy CR. 2007. *Legionella pneumophila* proteins  
745 that regulate Rab1 membrane cycling. Nature 450:365–369.

746

747 57. Stapels D, Woehl JL, Milder FJ, Tromp AT, van Batenburg AA, de Graaf WC, Broll SC, White  
748 NM, Rooijackers S, Geisbrecht BV. 2018. Evidence for multiple modes of neutrophil serine  
749 protease recognition by the EAP family of Staphylococcal innate immune evasion proteins.  
750 Protein Sci 27:509–522.

751

## 752 Tables

753 **Table 1.** Oligonucleotide primers used in this study

| Name           | Sequence (5' → 3') <sup>a</sup>                 |
|----------------|-------------------------------------------------|
| SusFSaII-F     | att <b>gtcgaca</b> atgataaaaggaaaacttatgcc      |
| SusFBgIII-F    | tgg <b>agatct</b> atgataaaaggaaaacttatgc        |
| SusFPstI-R     | gg <b>ctgcagt</b> tataaaataattggtcgag           |
| SidIBamHI-F2   | att <b>ggatcct</b> atgactaaaatacttattaactgc     |
| SidIBamHI-F    | att <b>ggatcc</b> atgactaaaatacttattaactgc      |
| SidINotI-R     | att <b>cgggccg</b> ctcaaaataccagtatcgattctttaag |
| SidICBamHI-F   | att <b>ggatcc</b> atgaattttatgattttgatgg        |
| SidICA68NotI-R | att <b>cgggccg</b> ctcatatattcttaataaatgatc     |



SidINNotI-R            **attg**cgggccgctcatctgaaacttttatcgtgctc

SidIPstI-R             **attctg**cagtcaaaataccagtatcgattc

---

754 <sup>a</sup>-restriction endonuclease cleavage sites are shown in bold

755

## 756 **Figure Legends**

757 **Figure 1. SusF and SidI interact directly with nanomolar affinity. (A)** Lysates from HEK 293  
758 cells stably expressing 3FLAG-SusF were incubated with glutathione beads coated with either  
759 GST or GST-SidI followed by Coomassie staining for total protein and Western blotting for SusF  
760 ( $\alpha$ -FLAG). Arrowheads indicate GST and GST-SidI proteins. **(B)** Lysates from *E. coli*  
761 overexpressing either GST or GST-SidI were incubated with Ni-NTA beads coated with His<sub>6</sub>-SusF  
762 followed by SDS-PAGE and Coomassie staining for proteins retained on the beads. Left panel:  
763 whole cell lysates from uninduced and induced cultures of *E. coli* expressing GST and GST-SidI  
764 proteins; Right panel: proteins retained on Ni-NTA beads (see *Materials and Methods*). **(C)**  
765 Chromatograms resulting from analytical scale gel-filtration separation of either SusF alone  
766 (green trace) or SusF bound to SidI (red trace). A chromatogram of known size standards is  
767 provided for reference (blue trace). **(D)** Binding of His<sub>6</sub>-SidI to immobilized SusF was assessed by  
768 SPR. The reference corrected sensorgram from a single-cycle experiment is shown in black, while  
769 the outcome of fitting to a two-state binding model is shown in red. The interaction is described  
770 by an apparent  $K_D$  of 3.1 nM, consisting of two individual steps where  $k_{on,1} = 2.7 \times 10^4 \text{ M}^{-1}\text{s}^{-1}$  and  
771  $k_{off,1} = 5.1 \times 10^{-4} \text{ s}^{-1}$  and  $k_{on,2} = 2.3 \times 10^{-3} \text{ s}^{-1}$  and  $k_{off,2} = 4.5 \times 10^{-4} \text{ s}^{-1}$ , respectively.

772

773 **Figure 2. SusF modulates SidI-mediated translation inhibition *in vitro*.** Translation of luciferase  
774 mRNA was quantified using a rabbit reticulocyte lysate kit. Translation of luciferase in the  
775 presence of **(A)** 4 ng His<sub>6</sub>-SidI or 20 ng SusF; **(B)** His<sub>6</sub>-SidI alone or 4 ng (37 fmol) His<sub>6</sub>-SidI and an  
776 equimolar amount of SusF (37 fmol); **(C)** His<sub>6</sub>-SidI alone or His<sub>6</sub>-SidI and SusF were added to *in*  
777 *vitro* translation reactions at the indicated times (-30 indicates pre-incubation of His<sub>6</sub>-SidI and  
778 SusF for 30 min prior to translation reaction); **(D)** Quantification of *In vitro* translation of Luc  
779 mRNA in the presence of His<sub>6</sub>-SidI alone or His<sub>6</sub>-SidI and SusF at increasing molar ratios (1:1, 2:1  
780 and 5:1 molar ratios of SusF:His<sub>6</sub>-SidI). Data are representative of at least two independent  
781 experiments and shown as mean ± s.d. of samples in triplicates. Asterisks denote statistical  
782 significance by *t*-test (\**P*<0.05, \*\**P*<0.01; n.s., not significant).

783

784 **Figure 3. SusF does not impair interaction between SidI and eEF1A.** **(A)** GST-SusF or GST alone  
785 were immobilized on magnetic glutathione agarose beads followed by incubation with 100 µg  
786 purified His<sub>6</sub>-SidI alone or that had been preincubated with lysates from HEK 293T cells as  
787 indicated (Lysates). Proteins were separated by SDS-PAGE and visualized by Coomassie staining  
788 or Western blot as indicated. **(B)** Lysates from *E. coli* expressing GST-SidI or GST alone were  
789 incubated with magnetic glutathione agarose beads and lysates from HEK 293T followed by 10,  
790 to 1000 µg of purified recombinant SusF (shown as increasing amounts in supernatants from  
791 beads). Proteins remaining on the beads were separated by SDS-PAGE and visualized by  
792 Coomassie stain or Western blot as indicated. GST-SidI (~130 kDa) and SusF (~27 kDa) are  
793 indicated with arrowheads. Data are representative of at least two independent experiments.

794

795 **Figure 4. SusF and eEF1A interact with distinct regions of SidI.** (A) Schematic representation of  
796 SidI truncation proteins. (B) Lysates from *E. coli* expressing GST-SidI constructs were incubated  
797 with glutathione agarose beads followed by washing and incubation with lysates from HEK 293  
798 cells stably expressing 3FLAG-SusF as indicated. Proteins were separated by SDS-PAGE and  
799 visualized by Coomassie stain (GST-SidI) or Western blot. Arrowheads indicate fusion proteins.  
800 Data are representative of three independent experiments.

801

802 **Figure 5. SusF is not required for Dot/Icm translocation of SidI into host cells.** (A) Western blot  
803 showing production of CyaA-RalF (~76 kDa) and CyaA-SidI<sub>IRP</sub> (~150 kDa) by the indicated *L.*  
804 *pneumophila* strains. (B) Quantification of cAMP extracted from CHO FcγRII cells infected with  
805 the indicated *L. pneumophila* strains. Asterisks denote statistical significance by *t*-test (\*\**P*<0.01).  
806 Data are representative of two independent experiments (n.s., not significant).

807

808 **Figure 6. Full-length SidI is required for translation inhibition.** Translation of luciferase mRNA  
809 quantified using a rabbit reticulocyte lysate kit. (A) Translation of luciferase mRNA in the  
810 presence of (A) 4 ng His<sub>6</sub>-SidI, His<sub>6</sub>-SidI<sub>N</sub>, His<sub>6</sub>-SidI<sub>C</sub>, or His<sub>6</sub>-SidI<sub>CA68</sub> or (B) 4 ng of His<sub>6</sub>-SidI alone  
811 or increasing amounts of His<sub>6</sub>-SidI<sub>CA68</sub> (4 ng, 50 ng, 100 ng). Asterisks denote statistical significance  
812 by *t*-test (\*\**P*<0.01). Data are representative of at least two independent experiments.

813

814 **Figure 7. SidI possesses glycosyltransferase activity. (A)** Quantification of GDP liberated from  
815 GDP-mannose in the presence or absence of 5  $\mu$ g purified His<sub>6</sub>-SidI. **(B)** Quantification of UDP  
816 liberated from UDP-glucose in the presence or absence of 5  $\mu$ g purified His<sub>6</sub>-SidI. Quantification  
817 of free GDP from GDP-mannose in the presence or absence of **(C)** 5  $\mu$ g His<sub>6</sub>-SidI full-length or  
818 truncated proteins, **(D)** 5  $\mu$ g His<sub>6</sub>-SidI and/or molar equivalent of SusF, or **(E)** increasing molar  
819 amount of SusF (1:1, 2:1, or 5:1 molar ratio of SusF:His<sub>6</sub>-SidI). Asterisks denote statistical  
820 significance by *t*-test (\*\* $P$ <0.01 and \* $P$ <0.05). Data are representative of at least two independent  
821 experiments.

822

### 823 Supplemental Information

#### 824 **Supplemental Figure Legends**

825 **Figure S1. Co-elution of SusF and SidI by gel filtration chromatography.** A sample of  
826 recombinant SidI bound to SusF was separated by analytical scale gel filtration chromatography  
827 as presented in Figure 1C. Ten  $\mu$ l of each column fraction were analyzed by SDS-PAGE followed  
828 by Coomassie staining to assess the protein content within each fraction. Fractions corresponding  
829 to the peak of approximately 150 kDa apparent molecular weight in the sample of SidI bound to  
830 SusT (Fig. 1C, red trace) contained both proteins, consistent with formation of a 1:1 complex  
831 between these two molecules.

832

833 **Figure S2. Binding of His<sub>6</sub>-SidI to immobilized SusF was assessed by SPR.** The reference  
834 corrected sensorgram from a single-cycle experiment is shown in black, while the outcome of  
835 fitting to a Langmuir binding model is shown in red. Using this model, the interaction is  
836 described by an apparent  $K_D$  of 0.89 nM where  $k_{on} = 2.2 \times 10^5 \text{ M}^{-1}\text{s}^{-1}$  and  $k_{off} = 1.9 \times 10^{-4} \text{ s}^{-1}$ ,  
837 respectively.

838

839 **Figure S3. eEF1A interacts with the SidI-SusF complex.** Lysates from *E. coli* expressing GST-SidI  
840 or GST alone were incubated with magnetic glutathione agarose beads and washed followed by  
841 addition of 10, 25, 50, 100, 200, 400, 800 or 1000  $\mu\text{g}$  of purified recombinant SusF (shown as  
842 increasing amounts in supernatants from beads). Beads were subsequently incubated with lysates  
843 from HEK 293T cells. Proteins remaining on the beads were separated by SDS-PAGE and  
844 visualized by Coomassie stain or Western blot

845

846 **Figure S4. Molecular model of SidI.** Ribbon cartoons of SidI modeled using the RaptorX  
847 webserver. Putative SidI domains are shown in red (residues 1-268), magenta (residues 269-874)  
848 and cyan (residues 874-942).

849

850 **Figure S5. Interaction between eEF1A and SidI truncations in the absence of SusF.** Lysates from  
851 *E. coli* expressing GST-SidI constructs were incubated with glutathione agarose beads followed  
852 by washing and incubation with lysates from HEK 293 cells. Proteins were separated by SDS-

853 PAGE and visualized by Coomassie staining (GST-SidI) or Western blotting (eEF1A). Data are  
854 representative of two independent experiments.

855

856 **Figure S6. SidI is modeled as a glycosyltransferase with a GT-B fold.** The model of the putative  
857 glycosyltransferase domain is presented in magenta ribbons superimposed to that of PimB (PDB:  
858 3OKA) represented as salmon ribbons, which was identified by DALI as the most similar  
859 structure in the PDB. The structure of PimB was solved in the presence of GDP (salmon spheres).

860

Figure 1

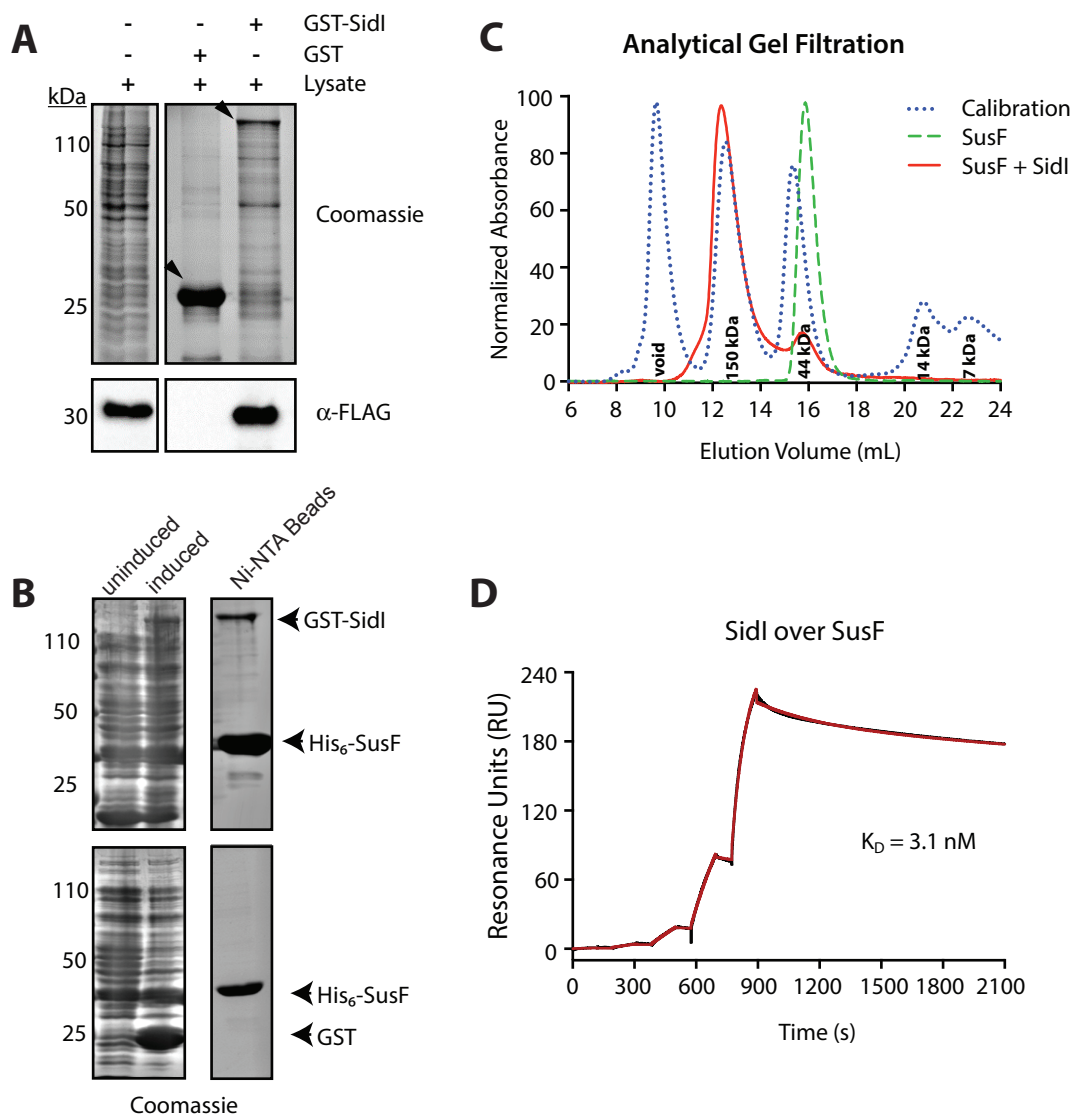

Figure 2

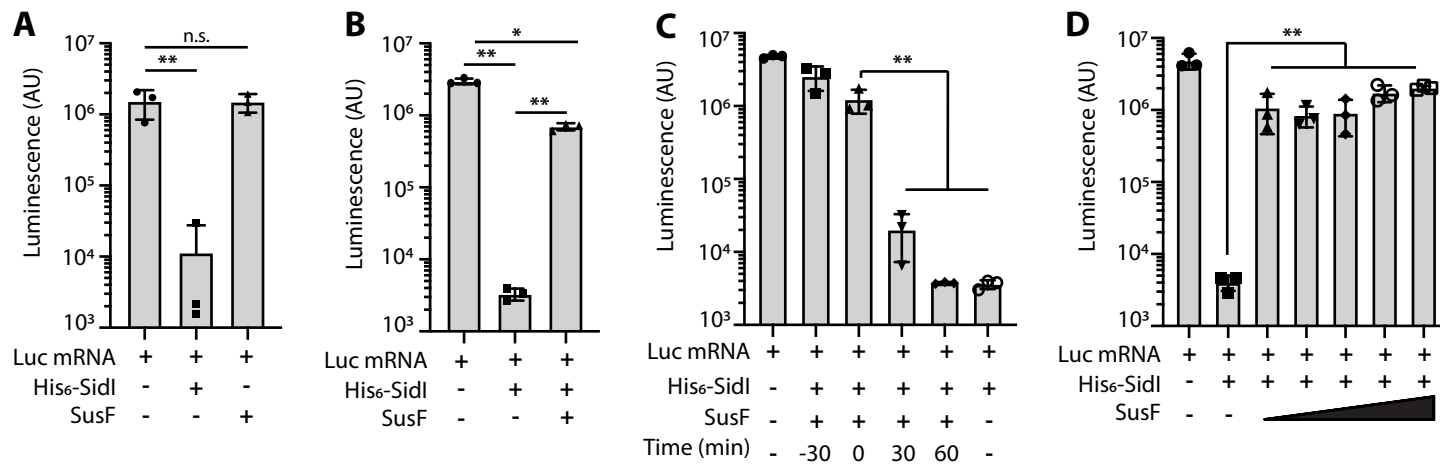



Figure 3

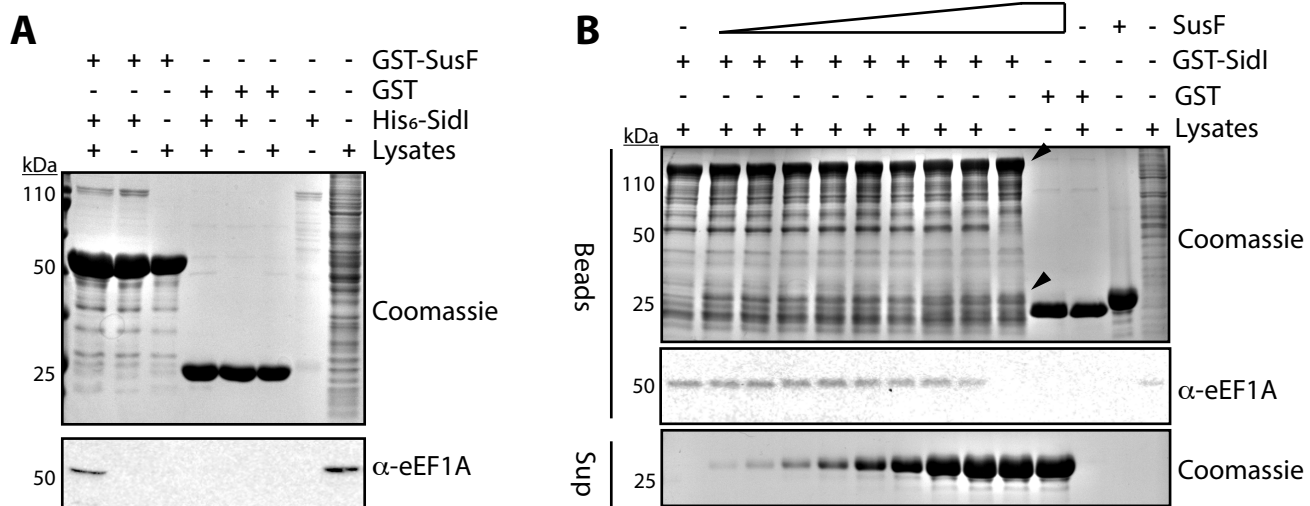

Figure 4

**A**

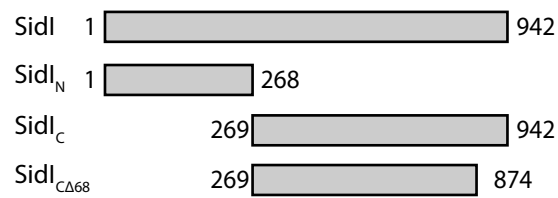

**B**

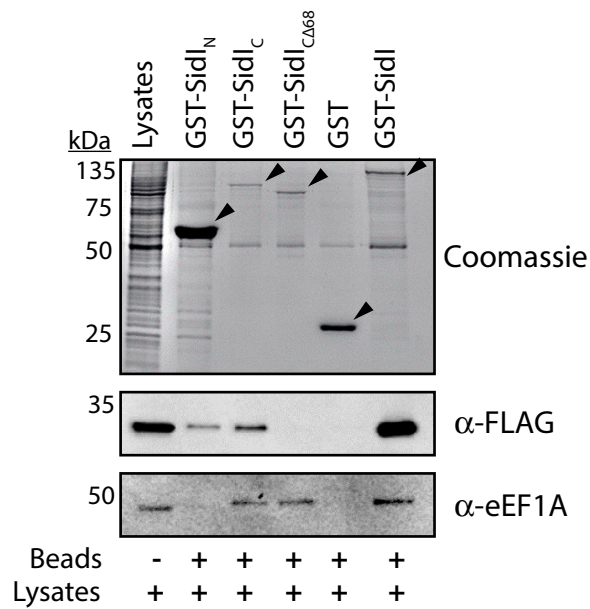

Figure 5

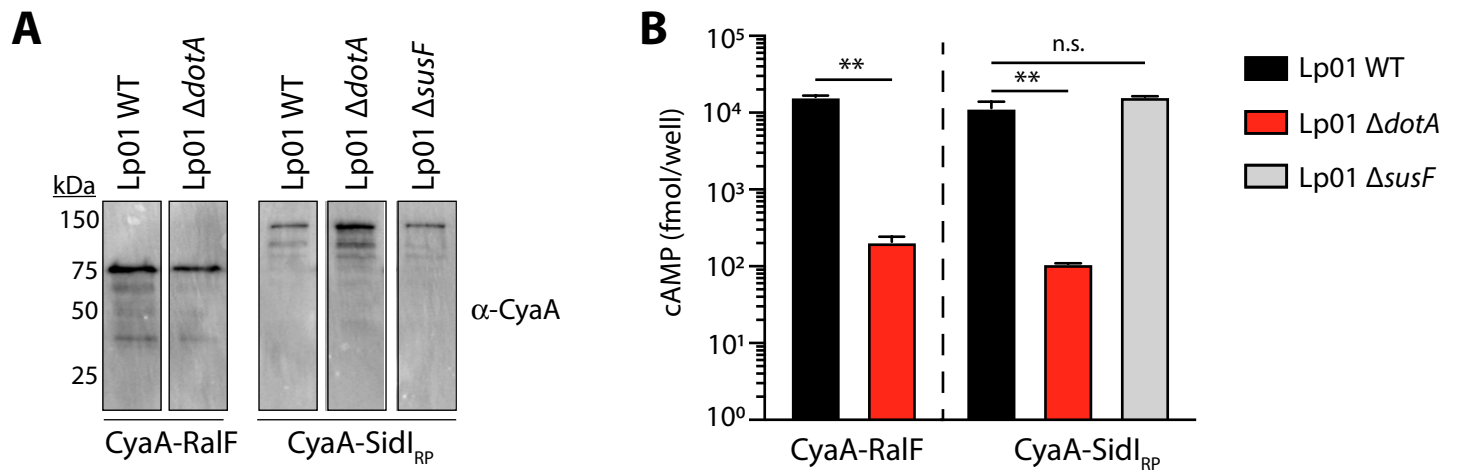

Figure 6

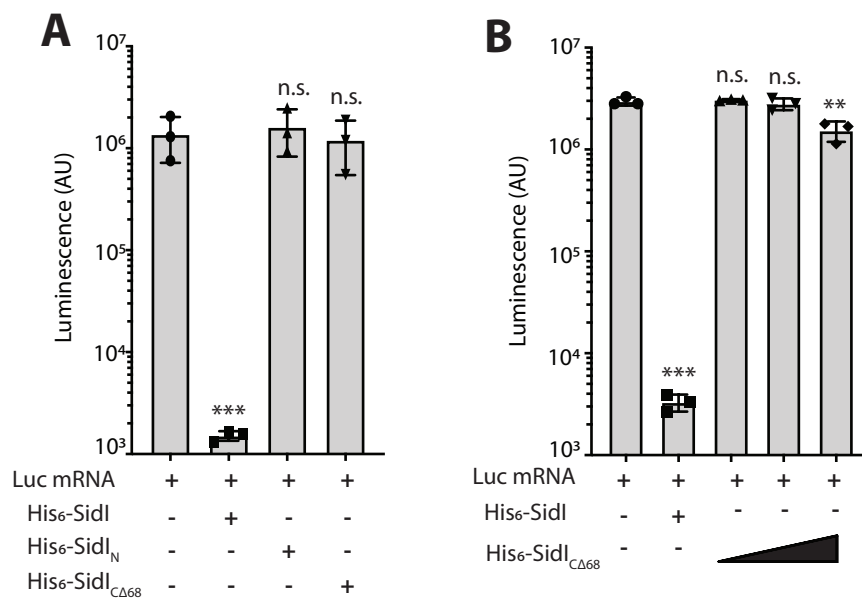

Figure 7

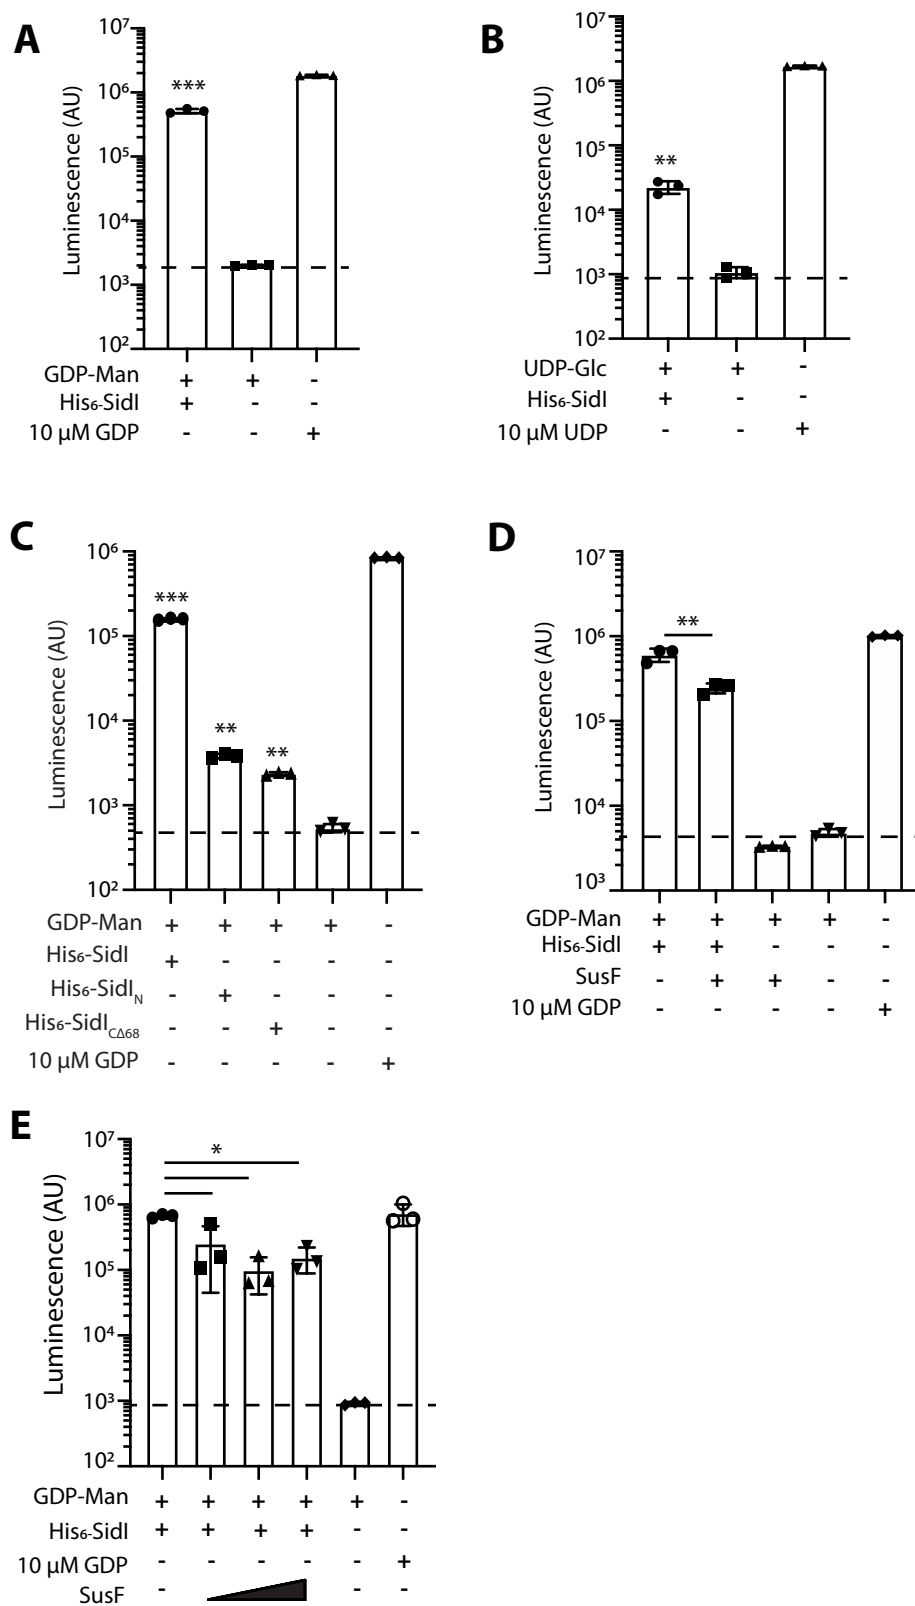

Figure S1

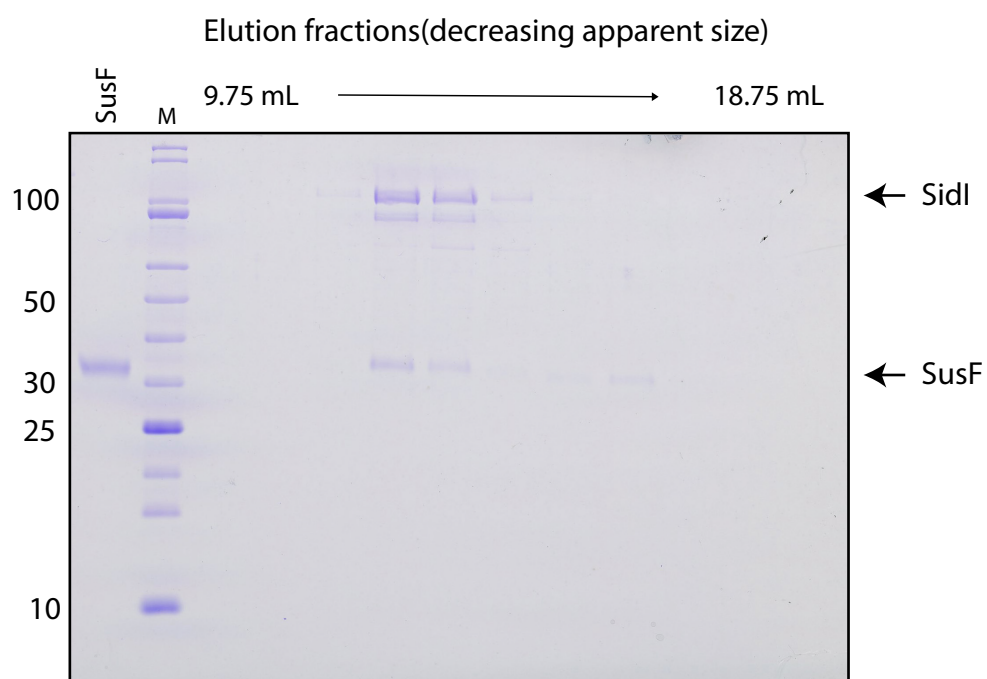

Figure S2

Sidl over SusF  
(Langmuir Binding)

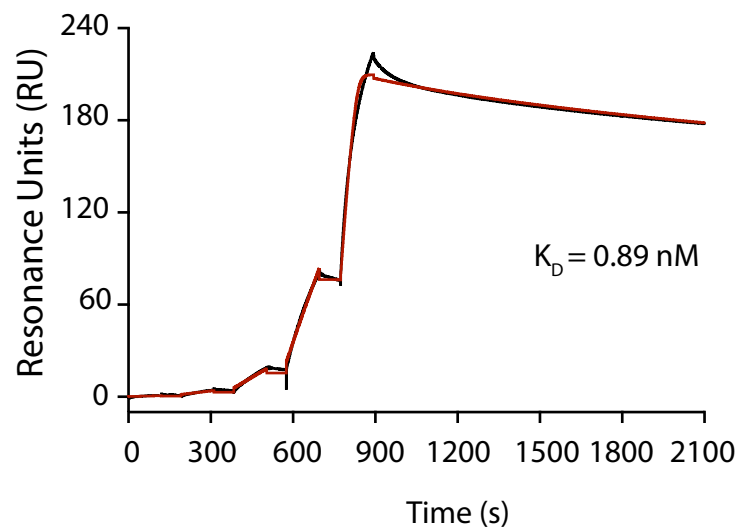

Figure S3

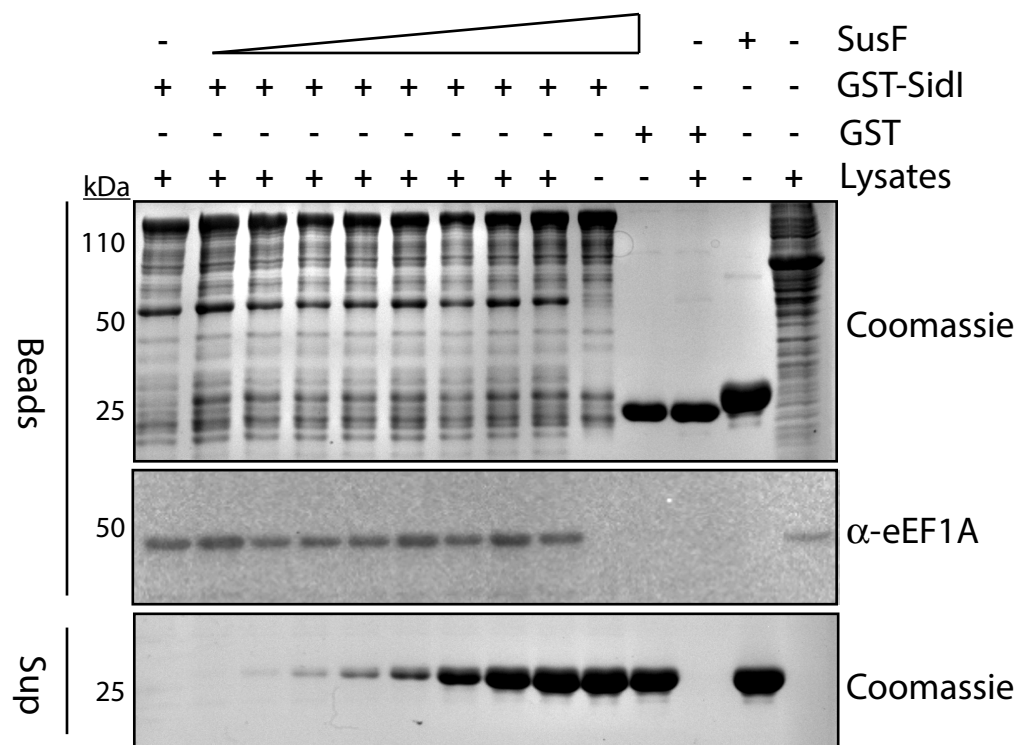



Figure S4

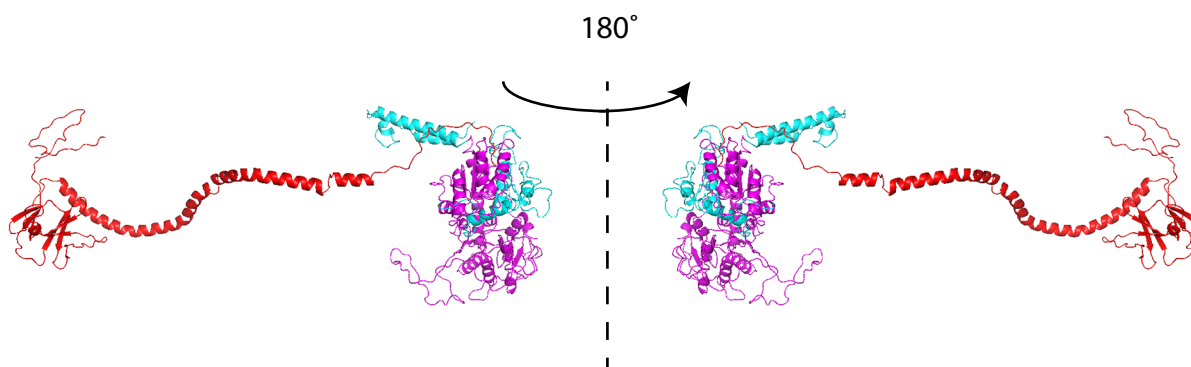

Figure S5

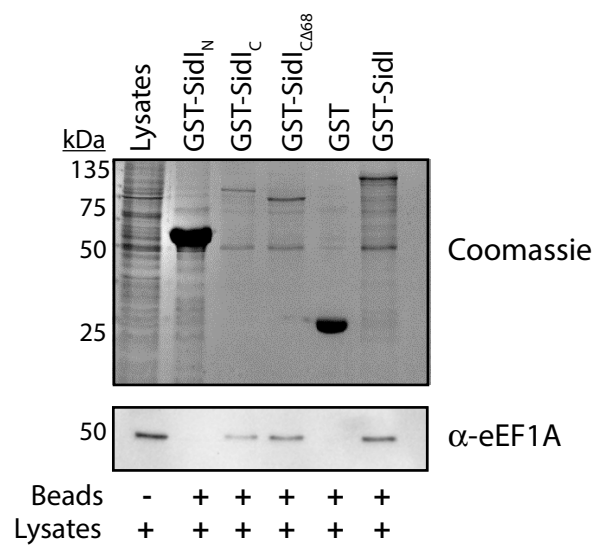

Figure S6

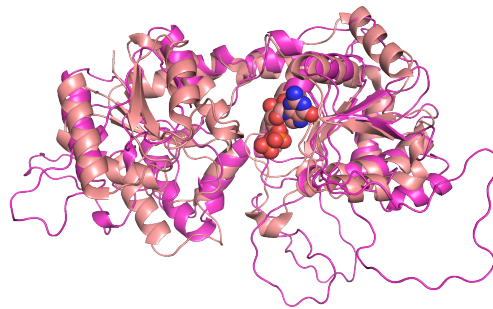

861 **Supplemental Tables**

862

863 **Table S1.** Proteins with homology to SidI (HHPred).

864

| 865 | No. PDB |                                | Prob | E-value | P-value | Score | SS   | Cols | Query HMM | Template HMM  |
|-----|---------|--------------------------------|------|---------|---------|-------|------|------|-----------|---------------|
| 866 |         |                                |      |         |         |       |      |      |           |               |
| 867 | 1       | 30KP_A GDP-mannose-dependent a | 99.8 | 8.2E-20 | 1.7E-24 | 181.2 | 33.6 | 338  | 376-868   | 22-376 (394)  |
| 868 | 2       | 4N9W_A GDP-mannose-dependent a | 99.8 | 3.7E-19 | 7.5E-24 | 175.7 | 36.7 | 342  | 370-868   | 17-364 (390)  |
| 869 | 3       | 5D01_B N-acetyl-alpha-D-glucos | 99.8 | 2.3E-19 | 4.7E-24 | 175.8 | 34.1 | 347  | 370-868   | 15-372 (379)  |
| 870 | 4       | 6D9T_A Glycosyl transferase (E | 99.8 | 1.3E-18 | 2.6E-23 | 173.7 | 33.4 | 348  | 370-868   | 30-387 (400)  |
| 871 | 5       | 2JJM_J GLYCOSYL TRANSFERASE, G | 99.8 | 1.1E-18 | 2.3E-23 | 174.8 | 32.9 | 346  | 372-868   | 27-382 (394)  |
| 872 | 6       | 3C48_A Predicted glycosyltrans | 99.8 | 3.6E-18 | 7.2E-23 | 172.6 | 35.2 | 352  | 370-868   | 40-422 (438)  |
| 873 | 7       | 3FR0_B GlgA glycogen synthase  | 99.8 | 5.5E-18 | 1.1E-22 | 169.0 | 34.6 | 347  | 370-868   | 16-427 (439)  |
| 874 | 8       | 2R60_A Glycosyl transferase, g | 99.8 | 1.1E-17 | 2.3E-22 | 172.5 | 37.8 | 351  | 370-868   | 31-456 (499)  |
| 875 | 9       | 3OY2_B Glycosyltransferase B73 | 99.7 | 1.3E-18 | 2.6E-23 | 176.1 | 28.3 | 339  | 376-868   | 17-387 (413)  |
| 876 | 10      | 6EJI_B WlaC protein; Glycosylt | 99.7 | 2E-17   | 4.1E-22 | 162.9 | 33.8 | 333  | 373-868   | 15-354 (373)  |
| 877 | 11      | 6GNE_A Probable starch synthas | 99.7 | 8.5E-18 | 1.7E-22 | 176.0 | 31.4 | 352  | 369-868   | 23-494 (508)  |
| 878 | 12      | 2QZS_A PROTEIN; glycosyl-trans | 99.7 | 1.6E-17 | 3.2E-22 | 171.3 | 28.9 | 347  | 371-869   | 16-474 (485)  |
| 879 | 13      | 2X6Q_A TREHALOSE-SYNTASE TRET  | 99.7 | 7.6E-17 | 1.5E-21 | 161.9 | 31.8 | 386  | 328-868   | 8-411 (416)   |
| 880 | 14      | 4XYW_A O-antigen biosynthesis  | 99.7 | 1.4E-16 | 2.8E-21 | 155.5 | 31.5 | 315  | 376-868   | 17-336 (338)  |
| 881 | 15      | 4XS0_A Glycosyltransferase (E. | 99.7 | 4.4E-17 | 8.9E-22 | 162.6 | 28.5 | 291  | 429-868   | 81-381 (388)  |
| 882 | 16      | 1RZV_A Glycogen synthase 1 (E. | 99.7 | 2.3E-16 | 4.6E-21 | 162.3 | 33.7 | 344  | 371-868   | 16-472 (485)  |
| 883 | 17      | 1V4V_B UDP-N-Acetylglucosamine | 99.7 | 5.1E-17 | 1E-21   | 160.9 | 25.2 | 341  | 370-869   | 13-366 (376)  |
| 884 | 18      | 2IW1_A LIPOPOLYSACCHARIDE CORE | 99.7 | 4.5E-16 | 9.2E-21 | 150.8 | 31.0 | 344  | 372-868   | 14-368 (374)  |
| 885 | 19      | 5ENZ_A UDP-GlcNAc 2-epimerase  | 99.6 | 1.3E-16 | 2.6E-21 | 159.1 | 26.6 | 344  | 367-869   | 6-366 (385)   |
| 886 | 20      | 1XV5_A DNA alpha-glycosyltrans | 99.6 | 8.9E-17 | 1.8E-21 | 163.7 | 25.6 | 348  | 370-868   | 13-399 (401)  |
| 887 | 21      | 2X0D_B WSAF; GT4 FAMILY, TRANS | 99.6 | 9E-16   | 1.8E-20 | 155.5 | 31.7 | 335  | 369-868   | 60-413 (413)  |
| 888 | 22      | 5N7Z_A Lipopolysaccharide 1,6- | 99.6 | 1.5E-15 | 3.1E-20 | 147.4 | 31.5 | 339  | 372-868   | 14-357 (359)  |
| 889 | 23      | 5E9T_C Glycosyltransferase Gtf | 99.6 | 1E-15   | 2E-20   | 163.6 | 32.1 | 312  | 388-868   | 169-497 (503) |
| 890 | 24      | 1VGV_D UDP-N-acetylglucosamine | 99.6 | 1.9E-16 | 3.8E-21 | 156.8 | 24.3 | 340  | 367-868   | 5-369 (384)   |
| 891 | 25      | 3T7D_A Putative glycosyltransf | 99.6 | 5.8E-16 | 1.2E-20 | 169.6 | 30.2 | 297  | 430-868   | 136-471 (497) |
| 892 | 26      | 4FKZ_B UDP-N-acetylglucosamine | 99.6 | 2.8E-16 | 5.7E-21 | 157.8 | 24.4 | 334  | 377-869   | 18-368 (388)  |
| 893 | 27      | 5DLA_A UDP-N-Acetylglucosamine | 99.6 | 4.3E-16 | 8.6E-21 | 158.4 | 25.6 | 338  | 369-868   | 16-378 (413)  |
| 894 | 28      | 3VUE_A Granule-bound starch sy | 99.6 | 3.1E-15 | 6.2E-20 | 162.0 | 32.3 | 350  | 372-868   | 26-508 (536)  |
| 895 | 29      | 5U0F_B Alpha,alpha-trehalose-p | 99.6 | 3.9E-16 | 7.9E-21 | 167.1 | 24.3 | 281  | 443-868   | 131-461 (481) |

|     |    |        |                         |      |         |         |       |      |     |         |               |
|-----|----|--------|-------------------------|------|---------|---------|-------|------|-----|---------|---------------|
| 896 | 30 | 3DZC_B | UDP-N-acetylglucosamine | 99.6 | 5.8E-16 | 1.2E-20 | 156.0 | 23.7 | 331 | 378-866 | 41-396 (396)  |
| 897 | 31 | 6GNF_A | Glycogen synthase (E.C. | 99.6 | 5.4E-15 | 1.1E-19 | 160.0 | 31.7 | 345 | 369-868 | 35-536 (544)  |
| 898 | 32 | 3S28_H | Sucrose synthase 1 (E.C | 99.6 | 3.6E-15 | 7.3E-20 | 176.5 | 32.3 | 341 | 382-868 | 320-766 (816) |
| 899 | 33 | 6NGG_A | Granule-bound starch sy | 99.6 | 5.7E-15 | 1.2E-19 | 165.6 | 32.2 | 347 | 368-868 | 52-556 (612)  |
| 900 | 34 | 30T5_B | UDP-N-acetylglucosamine | 99.6 | 1.1E-15 | 2.2E-20 | 154.9 | 23.3 | 333 | 378-869 | 43-393 (403)  |
| 901 | 35 | 4HWG_A | UDP-N-acetylglucosamine | 99.6 | 7.2E-16 | 1.5E-20 | 155.2 | 21.7 | 342 | 369-869 | 16-375 (385)  |
| 902 | 36 | 4X7R_B | TarM; Glycosyltransfera | 99.6 | 7.7E-15 | 1.6E-19 | 162.3 | 31.8 | 283 | 429-869 | 204-492 (493) |
| 903 | 37 | 5LQD_D | Alpha,alpha-trehalose-p | 99.6 | 4.7E-15 | 9.6E-20 | 159.7 | 29.0 | 287 | 443-868 | 146-462 (465) |
| 904 | 38 | 4HLN_A | Starch synthase I (E.C. | 99.6 | 1.1E-14 | 2.2E-19 | 163.4 | 33.0 | 343 | 369-868 | 138-622 (633) |
| 905 | 39 | 4PQG_A | Glycosyltransferase Gtf | 99.6 | 4.5E-15 | 9.1E-20 | 160.2 | 28.8 | 285 | 427-868 | 203-505 (511) |
| 906 | 40 | 5JI0_A | Alpha,alpha-trehalose-p | 99.5 | 5.3E-15 | 1.1E-19 | 156.1 | 25.3 | 307 | 443-868 | 136-474 (487) |
| 907 | 41 | 4L22_A | Phosphorylase (E.C.2.4. | 99.5 | 2.8E-15 | 5.8E-20 | 176.9 | 25.4 | 298 | 442-868 | 269-754 (758) |
| 908 | 42 | 5HV0_C | trehalose-6-phosphate p | 99.5 | 4.5E-15 | 9E-20   | 160.5 | 24.7 | 285 | 443-868 | 141-474 (479) |
| 909 | 43 | 3S2U_A | UDP-N-acetylglucosamine | 99.5 | 3.4E-14 | 7E-19   | 138.8 | 27.3 | 316 | 372-868 | 13-355 (365)  |
| 910 | 44 | 4W6Q_A | Glcosyltransferase C; G | 99.5 | 4.2E-14 | 8.4E-19 | 139.3 | 27.5 | 276 | 417-868 | 38-330 (333)  |
| 911 | 45 | 4NES_A | UDP-N-acetylglucosamine | 99.5 | 3.5E-15 | 7.2E-20 | 147.7 | 20.0 | 332 | 367-868 | 5-361 (374)   |
| 912 | 46 | 4RBN_B | Sucrose synthase:Glycos | 99.5 | 7.8E-14 | 1.6E-18 | 165.4 | 31.1 | 299 | 430-868 | 378-754 (794) |
| 913 | 47 | 4AMG_A | SNOGD; TRANSFERASE, POL | 99.5 | 3.9E-14 | 7.9E-19 | 140.7 | 23.7 | 322 | 372-869 | 33-400 (400)  |
| 914 | 48 | 3RHZ_B | Nucleotide sugar synthe | 99.5 | 9.8E-14 | 2E-18   | 136.6 | 26.1 | 279 | 414-868 | 44-334 (339)  |
| 915 | 49 | 3IA7_A | CalG4; Glycosyltransfe  | 99.5 | 3.1E-14 | 6.3E-19 | 139.0 | 22.3 | 343 | 372-869 | 15-398 (402)  |
| 916 | 50 | 5W8X_A | Lipid-A-disaccharide sy | 99.5 | 8.6E-14 | 1.7E-18 | 137.4 | 25.3 | 324 | 370-868 | 15-377 (382)  |
| 917 | 51 | 2P6P_B | Glycosyl transferase; C | 99.4 | 2.5E-13 | 5E-18   | 134.3 | 27.3 | 319 | 372-868 | 11-378 (384)  |
| 918 | 52 | 2IUU_A | GLYCOSYLTRANSFERASE; GL | 99.4 | 1.5E-13 | 3.1E-18 | 136.3 | 25.7 | 296 | 370-868 | 28-332 (342)  |
| 919 | 53 | 5VAF_B | Accessory Sec system pr | 99.4 | 6.3E-14 | 1.3E-18 | 152.9 | 24.9 | 282 | 429-869 | 214-520 (533) |
| 920 | 54 | 5V0T_B | Alpha,alpha-trehalose-p | 99.4 | 7.6E-14 | 1.5E-18 | 152.3 | 25.2 | 303 | 429-868 | 116-465 (494) |
| 921 | 55 | 1UQT_B | ALPHA, ALPHA-TREHALOSE- | 99.4 | 1.1E-13 | 2.3E-18 | 150.2 | 26.2 | 300 | 430-868 | 111-451 (482) |
| 922 | 56 | 4RIF_B | Glycosyl transferase ho | 99.4 | 3.8E-14 | 7.8E-19 | 140.7 | 20.1 | 321 | 370-868 | 9-373 (379)   |
| 923 | 57 | 5DXF_A | trehalose-6-phosphate p | 99.4 | 2.9E-13 | 5.8E-18 | 150.5 | 29.1 | 313 | 430-868 | 185-523 (534) |
| 924 | 58 | 1F0K_A | E. COLI MURG (E.C. 2.4. | 99.4 | 1.8E-12 | 3.6E-17 | 127.8 | 30.3 | 311 | 370-868 | 15-354 (364)  |
| 925 | 59 | 3TSA_A | NDP-rhamnosyltransferas | 99.4 | 2.1E-13 | 4.3E-18 | 134.2 | 23.5 | 320 | 372-868 | 12-387 (391)  |
| 926 | 60 | 5HVL_B | trehalose-6-phosphate p | 99.4 | 2.4E-13 | 4.8E-18 | 146.1 | 25.8 | 286 | 443-868 | 134-467 (478) |
| 927 | 61 | 6INF_A | UDP-glycosyltransferase | 99.4 | 5.4E-13 | 1.1E-17 | 133.6 | 26.2 | 332 | 373-867 | 24-454 (466)  |
| 928 | 62 | 3RSC_B | CalG2; TDP, enediyne, S | 99.4 | 6.8E-13 | 1.4E-17 | 131.3 | 26.5 | 320 | 372-868 | 31-412 (415)  |
| 929 | 63 | 3NB0_C | Glycogen [starch] synth | 99.4 | 1.8E-13 | 3.6E-18 | 158.6 | 25.4 | 287 | 429-868 | 164-630 (725) |
| 930 | 64 | 5I45_A | Glycosyl transferases g | 99.4 | 2.2E-13 | 4.4E-18 | 126.1 | 20.9 | 181 | 585-868 | 27-209 (218)  |
| 931 | 65 | 5ZFK_A | UDP-glucose:tetrahydrob | 99.4 | 9.6E-13 | 1.9E-17 | 127.7 | 26.2 | 325 | 372-868 | 21-348 (354)  |

|     |     |        |                         |      |         |         |       |      |     |         |               |
|-----|-----|--------|-------------------------|------|---------|---------|-------|------|-----|---------|---------------|
| 932 | 66  | 2HY7_A | Crystal Structure of Gu | 99.4 | 3.9E-13 | 8E-18   | 137.4 | 24.7 | 258 | 429-867 | 103-373 (406) |
| 933 | 67  | 2XCI_C | 3-DEOXY-D-MANNO-2-OCTUL | 99.4 | 5.3E-13 | 1.1E-17 | 138.5 | 25.6 | 312 | 376-868 | 53-374 (374)  |
| 934 | 68  | 5ZLR_A | NeuC protein; NeuC, UDP | 99.4 | 5.2E-13 | 1.1E-17 | 132.2 | 24.0 | 315 | 376-868 | 18-364 (380)  |
| 935 | 69  | 30TI_B | CalG3; Calicheamicin, T | 99.3 | 6.1E-13 | 1.2E-17 | 131.7 | 21.7 | 323 | 370-868 | 29-396 (398)  |
| 936 | 70  | 5DU2_A | CalS8; glycosyltransfer | 99.3 | 1.1E-12 | 2.3E-17 | 129.9 | 23.1 | 322 | 372-868 | 37-415 (419)  |
| 937 | 71  | 1L5W_A | MALTODEXTRIN PHOSPHORYL | 99.3 | 2.1E-13 | 4.2E-18 | 162.7 | 21.2 | 346 | 429-868 | 277-791 (796) |
| 938 | 72  | 4FZR_A | Ssf56; Structural Genom | 99.3 | 4.4E-13 | 8.9E-18 | 132.7 | 19.6 | 319 | 372-866 | 26-397 (398)  |
| 939 | 73  | 30TG_A | CalG1; Calicheamicin, T | 99.3 | 3.3E-12 | 6.6E-17 | 129.3 | 24.4 | 324 | 370-868 | 29-407 (412)  |
| 940 | 74  | 4QLB_D | Probable glycogen [star | 99.3 | 2.6E-12 | 5.4E-17 | 150.1 | 26.4 | 297 | 429-868 | 178-632 (674) |
| 941 | 75  | 3HBJ_A | Flavonoid 3-O-glucosylt | 99.3 | 1.8E-11 | 3.6E-16 | 124.1 | 28.6 | 328 | 378-868 | 30-452 (454)  |
| 942 | 76  | 2IYA_B | OLEANDOMYCIN GLYCOSYLTR | 99.2 | 7.4E-12 | 1.5E-16 | 122.5 | 23.6 | 322 | 371-868 | 22-420 (424)  |
| 943 | 77  | 4X1T_A | Monogalactosyldiacylgly | 99.2 | 3.8E-11 | 7.7E-16 | 120.7 | 27.5 | 324 | 372-868 | 17-384 (408)  |
| 944 | 78  | 2ACV_B | triterpene UDP-glucosyl | 99.2 | 3.7E-11 | 7.5E-16 | 122.1 | 27.2 | 337 | 372-868 | 20-461 (463)  |
| 945 | 79  | 2YJN_A | GLYCOSYLTRANSFERASE, DT | 99.2 | 2.5E-12 | 5.1E-17 | 129.2 | 18.4 | 323 | 372-869 | 31-435 (441)  |
| 946 | 80  | 2VSY_B | XCC0866; TRANSFERASE, G | 99.2 | 1.9E-11 | 3.9E-16 | 135.3 | 26.9 | 326 | 371-868 | 217-556 (568) |
| 947 | 81  | 3QHP_A | Type 1 capsular polysac | 99.2 | 6.1E-12 | 1.2E-16 | 110.8 | 17.6 | 163 | 586-863 | 1-166 (166)   |
| 948 | 82  | 3WAD_B | Glycosyltransferase; GL | 99.2 | 1.6E-11 | 3.2E-16 | 121.0 | 20.8 | 316 | 371-868 | 10-413 (419)  |
| 949 | 83  | 4ZHT_B | Bifunctional UDP-N-acet | 99.2 | 2.4E-11 | 4.9E-16 | 124.2 | 22.7 | 268 | 429-868 | 92-374 (411)  |
| 950 | 84  | 2C4M_A | GLYCOGEN PHOSPHORYLASE  | 99.1 | 2.4E-11 | 4.9E-16 | 145.7 | 25.8 | 301 | 442-868 | 287-785 (796) |
| 951 | 85  | 5DJS_B | Tetratricopeptide TPR_2 | 99.1 | 1.1E-10 | 2.2E-15 | 128.0 | 26.9 | 330 | 370-868 | 173-512 (529) |
| 952 | 86  | 2GJ4_A | Glycogen phosphorylase, | 99.1 | 2.6E-10 | 5.3E-15 | 137.7 | 30.3 | 295 | 442-868 | 318-813 (824) |
| 953 | 87  | 5GL5_B | Sterol 3-beta-glucosylt | 99.1 | 2.6E-10 | 5.3E-15 | 117.1 | 25.5 | 358 | 373-868 | 51-459 (498)  |
| 954 | 88  | 5E9T_D | Glycosyltransferase Gtf | 99.0 | 6.5E-11 | 1.3E-15 | 129.3 | 21.3 | 230 | 475-869 | 215-446 (447) |
| 955 | 89  | 2BFW_A | GLGA GLYCOGEN SYNTHASE  | 99.0 | 1.1E-10 | 2.2E-15 | 106.4 | 18.7 | 161 | 585-856 | 34-200 (200)  |
| 956 | 90  | 4LDP_B | NDP-forosamyltransferas | 99.0 | 9.3E-11 | 1.9E-15 | 118.1 | 19.7 | 323 | 372-868 | 27-440 (455)  |
| 957 | 91  | 3Q3E_A | HMW1C-like glycosyltran | 99.0 | 2.3E-10 | 4.7E-15 | 132.2 | 24.2 | 279 | 425-868 | 330-624 (631) |
| 958 | 92  | 4BQE_B | ALPHA-GLUCAN PHOSPHORYL | 99.0 | 5.5E-10 | 1.1E-14 | 136.0 | 28.0 | 315 | 442-868 | 364-865 (874) |
| 959 | 93  | 1YGP_A | YEAST GLYCOGEN PHOSPHOR | 99.0 | 5.2E-10 | 1.1E-14 | 136.0 | 27.6 | 304 | 439-868 | 354-872 (879) |
| 960 | 94  | 3H4T_A | Glycosyltransferase Gtf | 98.9 | 2.7E-10 | 5.5E-15 | 112.9 | 17.6 | 320 | 373-868 | 12-381 (404)  |
| 961 | 95  | 4REL_A | UDP-glucose:anthocyanid | 98.9 | 3.2E-09 | 6.4E-14 | 108.3 | 24.5 | 332 | 378-868 | 21-443 (446)  |
| 962 | 96  | 4BFC_A | 3-DEOXY-D-MANNO-OCTULOS | 98.8 | 9E-10   | 1.8E-14 | 105.4 | 18.2 | 180 | 586-869 | 40-232 (235)  |
| 963 | 97  | 2F9F_A | first mannosyl transfer | 98.8 | 9.1E-10 | 1.8E-14 | 100.5 | 17.2 | 157 | 582-849 | 18-175 (177)  |
| 964 | 98  | 5V2J_A | UDP-glycosyltransferase | 98.8 | 4.5E-09 | 9.1E-14 | 106.2 | 23.7 | 330 | 376-868 | 20-446 (449)  |
| 965 | 99  | 5LR8_A | Hv_Ph01 (E.C.2.4.1.1);  | 98.8 | 2.8E-09 | 5.6E-14 | 130.9 | 25.4 | 241 | 494-868 | 527-917 (938) |
| 966 | 100 | 6FJ3_A | Parathyroid hormone/par | 98.8 | 1.5E-09 | 3.1E-14 | 121.6 | 20.9 | 174 | 585-868 | 353-532 (602) |
| 967 | 101 | 4M83_A | Oleandomycin glycosyltr | 98.8 | 2.1E-08 | 4.3E-13 | 103.3 | 25.6 | 318 | 378-868 | 24-398 (415)  |

|      |     |        |                         |      |         |         |       |      |     |         |               |
|------|-----|--------|-------------------------|------|---------|---------|-------|------|-----|---------|---------------|
| 968  | 102 | 1IIR_A | glycosyltransferase Gtf | 98.7 | 2.8E-09 | 5.7E-14 | 105.8 | 16.5 | 313 | 373-868 | 12-398 (415)  |
| 969  | 103 | 1RRV_A | GLYCOSYLTRANSFERASE GTF | 98.7 | 1.5E-08 | 3.1E-13 | 101.6 | 20.7 | 316 | 373-869 | 12-400 (416)  |
| 970  | 104 | 6IJ7_A | Rhamnosyltransferase pr | 98.6 | 1.4E-07 | 2.8E-12 | 95.8  | 26.8 | 281 | 429-868 | 102-433 (435) |
| 971  | 105 | 6BK0_A | UDP-glycosyltransferase | 98.6 | 1.4E-07 | 2.8E-12 | 96.1  | 25.7 | 323 | 378-868 | 32-465 (467)  |
| 972  | 106 | 2VCH_A | HYDROQUINONE GLUCOSYLTR | 98.3 | 7.9E-06 | 1.6E-10 | 84.3  | 28.7 | 340 | 373-868 | 18-467 (480)  |
| 973  | 107 | 3HBM_A | UDP-sugar hydrolase; ud | 98.2 | 4.3E-07 | 8.7E-12 | 89.2  | 17.0 | 254 | 377-777 | 23-281 (282)  |
| 974  | 108 | 2PQ6_A | UDP-glucuronosyl/UDP-gl | 98.0 | 1.6E-05 | 3.2E-10 | 81.4  | 22.3 | 333 | 378-868 | 25-477 (482)  |
| 975  | 109 | 2C1X_A | UDP-GLUCOSE FLAVONOID 3 | 97.6 | 0.00018 | 3.7E-09 | 74.3  | 21.4 | 284 | 429-868 | 95-450 (456)  |
| 976  | 110 | 5WQC_A | Orexin receptor type 2, | 97.1 | 0.00055 | 1.1E-08 | 76.6  | 18.4 | 169 | 585-863 | 291-464 (560) |
| 977  | 111 | 206L_B | UDP-glucuronosyltransfe | 96.5 | 0.0036  | 7.2E-08 | 56.3  | 12.4 | 144 | 584-850 | 19-168 (170)  |
| 978  | 112 | 3L7I_A | Teichoic acid biosynthe | 96.4 | 0.0077  | 1.6E-07 | 70.8  | 16.8 | 350 | 355-833 | 317-725 (729) |
| 979  | 113 | 5U09_A | Cannabinoid receptor 1, | 96.0 | 0.044   | 8.8E-07 | 61.4  | 18.2 | 177 | 585-870 | 243-424 (508) |
| 980  | 114 | 5ZIC_A | Alpha-1,6-mannosylglyco | 95.9 | 0.014   | 2.8E-07 | 69.0  | 13.7 | 157 | 585-873 | 226-407 (523) |
| 981  | 115 | 1PSW_A | ADP-HEPTOSE LPS HEPTOSY | 95.3 | 0.13    | 2.6E-06 | 52.7  | 14.8 | 166 | 585-831 | 179-348 (348) |
| 982  | 116 | 5GVV_A | Glycosyl transferase fa | 95.3 | 0.023   | 4.6E-07 | 62.2  | 9.9  | 111 | 606-778 | 289-401 (406) |
| 983  | 117 | 2GT1_A | Lipopolysaccharide hept | 94.9 | 0.16    | 3.3E-06 | 51.5  | 13.4 | 145 | 585-831 | 177-325 (326) |
| 984  | 118 | 3TOV_B | Glycosyl transferase fa | 94.4 | 0.24    | 4.8E-06 | 50.6  | 12.3 | 113 | 585-760 | 184-299 (349) |
| 985  | 119 | 6JTD_A | C-glycosyltransferase;  | 92.6 | 1.7     | 3.5E-05 | 46.2  | 14.0 | 166 | 585-868 | 273-476 (483) |
| 986  | 120 | 5NLM_B | indoxyl UDP-glucosyltra | 90.1 | 8.9     | 0.00018 | 40.9  | 15.2 | 167 | 585-868 | 273-474 (478) |
| 987  | 121 | 6MGB_A | Capsular polysaccharide | 87.7 | 4.1     | 8.4E-05 | 43.9  | 10.4 | 102 | 584-746 | 153-262 (326) |
| 988  | 122 | 5IJO_T | Nuclear pore complex pr | 85.2 | 31      | 0.00064 | 41.9  | 16.5 | 192 | 129-377 | 322-515 (522) |
| 989  | 123 | 6HLP_A | Substance-P receptor,Su | 84.5 | 21      | 0.00043 | 40.1  | 13.9 | 177 | 585-870 | 256-437 (520) |
| 990  | 124 | 6MGC_A | Capsule polysaccharide  | 83.7 | 5.7     | 0.00012 | 43.7  | 8.9  | 101 | 585-746 | 147-255 (361) |
| 991  | 125 | 1JIX_A | DNA BETA-GLUCOSYLTRANSF | 76.1 | 8.9     | 0.00018 | 43.9  | 6.9  | 108 | 696-855 | 229-345 (351) |
| 992  | 126 | 6MGD_A | Capsular polysaccharide | 66.3 | 30      | 0.00061 | 37.7  | 7.9  | 99  | 585-746 | 151-259 (332) |
| 993  | 127 | 4RAP_I | Glycosyltransferase Tib | 57.6 | 2.3E+02 | 0.0047  | 31.7  | 12.8 | 169 | 585-828 | 215-389 (406) |
| 994  | 128 | 5IJO_G | Nuclear pore complex pr | 57.6 | 1.2E+02 | 0.0024  | 37.8  | 11.3 | 178 | 121-308 | 241-431 (599) |
| 995  | 129 | 5FA1_A | Cell division protein Z | 56.1 | 57      | 0.0012  | 37.3  | 8.0  | 91  | 585-746 | 219-316 (410) |
| 996  | 130 | 2JZC_A | UDP-N-acetylglucosamine | 53.1 | 2.4E+02 | 0.0049  | 30.3  | 11.5 | 120 | 568-748 | 10-160 (224)  |
| 997  | 131 | 4UXV_A | SEPTATION RING FORMATIO | 50.5 | 5.5E+02 | 0.011   | 29.9  | 14.6 | 150 | 138-328 | 361-515 (545) |
| 998  | 132 | 2KS6_A | UDP-N-acetylglucosamine | 49.7 | 1.8E+02 | 0.0036  | 30.6  | 9.6  | 108 | 582-750 | 1-139 (201)   |
| 999  | 133 | 5XEI_A | Chromosome partition pr | 43.5 | 7.5E+02 | 0.015   | 28.8  | 21.8 | 316 | 136-481 | 161-482 (540) |
| 1000 | 134 | 5ZIB_A | Alpha-1,6-mannosylglyco | 42.1 | 54      | 0.0011  | 40.7  | 5.1  | 49  | 697-748 | 374-423 (626) |
| 1001 | 135 | 4P5E_B | 2'-deoxynucleoside 5'-p | 36.7 | 3.1E+02 | 0.0063  | 25.7  | 8.2  | 80  | 625-746 | 1-99 (152)    |
| 1002 | 136 | 5NPS_A | UDP-N-acetylglucosamine | 35.2 | 1.7E+02 | 0.0034  | 37.3  | 7.7  | 105 | 590-749 | 519-625 (718) |
| 1003 | 137 | 6QAI_B | deoxyribosyltransferase | 34.6 | 5.5E+02 | 0.011   | 24.5  | 10.1 | 83  | 624-746 | 3-99 (156)    |

|      |       |        |                         |      |         |        |      |      |     |         |                |
|------|-------|--------|-------------------------|------|---------|--------|------|------|-----|---------|----------------|
| 1004 | 138   | 3EHD_A | uncharacterized conserv | 33.2 | 4.8E+02 | 0.0097 | 24.8 | 9.0  | 82  | 624-746 | 2-102 (162)    |
| 1005 | 139   | 4UX3_A | STRUCTURAL MAINTENANCE  | 32.9 | 1.2E+03 | 0.025  | 28.0 | 22.5 | 328 | 128-482 | 140-492 (543)  |
| 1006 | 140   | 6EK8_A | YaxB; pathogens, pore f | 25.7 | 8.4E+02 | 0.017  | 27.8 | 10.6 | 107 | 138-244 | 147-255 (344)  |
| 1007 | 141   | 6CFZ_H | Ask1, Dad3, Dad2, Duo1, | 25.4 | 1.3E+02 | 0.0027 | 26.3 | 3.4  | 35  | 273-308 | 8-42 (56)      |
| 1008 | 142   | 5AX7_A | Pyruvyl transferase 1;  | 23.8 | 1.3E+03 | 0.026  | 25.1 | 18.0 | 227 | 414-746 | 68-300 (348)   |
| 1009 | 143   | 3U4Q_B | ATP-dependent helicase/ | 22.8 | 1.9E+03 | 0.039  | 27.8 | 13.8 | 205 | 215-429 | 383-615 (1166) |
| 1010 | 144   | 3ILW_A | DNA gyrase subunit A (E | 21.2 | 1E+03   | 0.02   | 28.1 | 10.4 | 155 | 232-392 | 298-463 (470)  |
| 1011 | 145   | 5J0J_A | designed protein 2L6HC3 | 21.0 | 7.8E+02 | 0.016  | 22.7 | 7.2  | 68  | 139-217 | 9-76 (79)      |
| 1012 | 146   | 2KE4_A | Cdc42-interacting prote | 20.2 | 9.1E+02 | 0.018  | 22.6 | 8.0  | 79  | 147-225 | 13-91 (98)     |
| 1013 | <hr/> |        |                         |      |         |        |      |      |     |         |                |
